# Supplementary material for: In Vivo and In Vitro Metabolic Fate and Urinary Detectability of Five Deschloroketamine Derivatives Studied by Means of Hyphenated Mass Spectrometry
Source: MDPI journal article supplement (doi:10.3390/metabo14050270), 2024-05-08
Supplement: s1 [file s1]

# ***In Vivo* and *in Vitro* Metabolic Fate and Urinary Detectability of Five Deschloroketamine Derivatives Studied by Means of Hyphenated Mass Spectrometry**

**Fabian Frankenfeld<sup>1</sup>, Lea Wagmann<sup>1</sup>, Anush Abelian<sup>2</sup>, Jason Wallach<sup>2</sup>, Adeboye Adejare<sup>2</sup>, Simon D. Brandt<sup>3</sup> and Markus R. Meyer<sup>1,\*</sup>**

<sup>1</sup> Department of Experimental and Clinical Toxicology, Institute of Experimental and Clinical Pharmacology and Toxicology, Center for Molecular Signaling (PZMS), Saarland University, Homburg, Germany; Fabian.Frankenfeld@uks.eu; Lea.Wagmann@uks.eu

<sup>2</sup> Department of Pharmaceutical Sciences, Philadelphia College of Pharmacy, Saint Joseph's University, Philadelphia, Pennsylvania, 19104, USA; aabelian@sju.edu, jwallach@sju.edu, aadejare@sju.edu

<sup>3</sup> School of Pharmacy and Biomolecular Sciences, Liverpool John Moores University, Liverpool L3 3AF, UK; s.brandt@ljmu.ac.uk

\* Correspondence: markus.meyer@uks.eu Tel.: +49-6841-16-26438

**Keywords:** new psychoactive substance; deschloroketamine; deschloro-*N*-ethyl-ketamine; deschloro-*N*-isopropyl-ketamine; deschloro-*N*-cyclopropyl-ketamine; deschloro-*N*-propyl-ketamine; metabolism; *in vivo*; *in vitro*; LC-HRMS/MS;

**Table S1.** List of *in vivo* phase I and II metabolites of 2-oxo-PCcP, identified in rat urine samples and *in vitro* phase I metabolites identified in incubations using pooled human liver microsomes (pHLM), including the respective metabolite ID, metabolic reaction, masses of the precursor ion (PI) and characteristic fragment ions (FI) detected in MS<sup>2</sup>, calculated exact masses, elemental composition, calculated mass errors in parts per million (ppm), retention times (RT) in minutes, and system in which metabolites were identified. The metabolites are sorted by their mass and RT. pHLM, identified in pHLM incubations; rat, identified in rat urine samples

| Metabolite ID | Metabolic Reaction                       | Characteristic Ions Measured Accurate Masses | Calculated Exact Masses, <i>m/z</i> | Elemental Composition                            | Error, ppm | RT, min | Identified in |
|---------------|------------------------------------------|----------------------------------------------|-------------------------------------|--------------------------------------------------|------------|---------|---------------|
| 2-Oxo-PCcP    | Parent compound                          | PI at <i>m/z</i> 230.1537                    | 230.1539                            | C <sub>15</sub> H <sub>20</sub> ON               | -0.91      | 5.70    | pHLM and rat  |
|               |                                          | FI at <i>m/z</i> 212.1430                    | 212.1434                            | C <sub>15</sub> H <sub>18</sub> N                | -1.68      |         |               |
|               |                                          | FI at <i>m/z</i> 173.0958                    | 173.0961                            | C <sub>12</sub> H <sub>13</sub> O                | -1.63      |         |               |
|               |                                          | FI at <i>m/z</i> 155.0849                    | 155.0855                            | C <sub>12</sub> H <sub>11</sub>                  | -4.04      |         |               |
|               |                                          | FI at <i>m/z</i> 145.1009                    | 145.1012                            | C <sub>11</sub> H <sub>13</sub>                  | -1.76      |         |               |
|               |                                          | FI at <i>m/z</i> 129.0697                    | 129.0699                            | C <sub>10</sub> H <sub>9</sub>                   | -1.12      |         |               |
|               |                                          | FI at <i>m/z</i> 117.0698                    | 117.0699                            | C <sub>9</sub> H <sub>9</sub>                    | -0.78      |         |               |
|               |                                          | FI at <i>m/z</i> 91.0546                     | 91.0542                             | C <sub>7</sub> H <sub>7</sub>                    | 3.72       |         |               |
|               |                                          | FI at <i>m/z</i> 58.0659                     | 58.0651                             | C <sub>3</sub> H <sub>8</sub> N                  | 13.0       |         |               |
| CM1           | <i>N</i> -Dealkylation                   | PI at <i>m/z</i> 190.1222                    | 190.1226                            | C <sub>12</sub> H <sub>16</sub> ON               | -2.52      | 5.06    | pHLM and rat  |
|               |                                          | FI at <i>m/z</i> 173.0961                    | 173.0961                            | C <sub>12</sub> H <sub>13</sub> O                | -0.05      |         |               |
|               |                                          | FI at <i>m/z</i> 155.0854                    | 155.0855                            | C <sub>12</sub> H <sub>11</sub>                  | -0.94      |         |               |
|               |                                          | FI at <i>m/z</i> 145.1011                    | 145.1012                            | C <sub>11</sub> H <sub>13</sub>                  | -0.37      |         |               |
|               |                                          | FI at <i>m/z</i> 129.0700                    | 129.0699                            | C <sub>10</sub> H <sub>9</sub>                   | 0.89       |         |               |
|               |                                          | FI at <i>m/z</i> 117.0702                    | 117.0699                            | C <sub>9</sub> H <sub>9</sub>                    | 2.74       |         |               |
|               |                                          | FI at <i>m/z</i> 91.0548                     | 91.0542                             | C <sub>7</sub> H <sub>7</sub>                    | 6.10       |         |               |
|               |                                          | FI at <i>m/z</i> 67.0550                     | 67.0542                             | C <sub>5</sub> H <sub>7</sub>                    | 12.0       |         |               |
| CM2           | <i>N</i> -Dealkylation + acetylation     | PI at <i>m/z</i> 232.1330                    | 232.1332                            | C <sub>14</sub> H <sub>18</sub> O <sub>2</sub> N | -0.90      | 6.81    | rat           |
|               |                                          | FI at <i>m/z</i> 173.0959                    | 173.0961                            | C <sub>12</sub> H <sub>13</sub> O                | -1.19      |         |               |
|               |                                          | FI at <i>m/z</i> 145.1015                    | 145.1012                            | C <sub>11</sub> H <sub>13</sub>                  | 2.34       |         |               |
|               |                                          | FI at <i>m/z</i> 129.0968                    | 129.0699                            | C <sub>10</sub> H <sub>9</sub>                   | -0.41      |         |               |
|               |                                          | FI at <i>m/z</i> 91.0547                     | 91.0542                             | C <sub>7</sub> H <sub>7</sub>                    | 5.47       |         |               |
|               |                                          | FI at <i>m/z</i> 67.0549                     | 67.0542                             | C <sub>5</sub> H <sub>7</sub>                    | 10.6       |         |               |
| CM3           | Hydroxylation isomer 1                   | PI at <i>m/z</i> 246.1486                    | 246.1489                            | C <sub>15</sub> H <sub>20</sub> O <sub>2</sub> N | -0.95      | 4.56    | pHLM and rat  |
|               |                                          | FI at <i>m/z</i> 189.0907                    | 189.0910                            | C <sub>12</sub> H <sub>13</sub> O <sub>2</sub>   | -1.55      |         |               |
|               |                                          | FI at <i>m/z</i> 171.0804                    | 171.0804                            | C <sub>12</sub> H <sub>11</sub> O                | -0.43      |         |               |
|               |                                          | FI at <i>m/z</i> 143.0856                    | 143.0855                            | C <sub>11</sub> H <sub>11</sub>                  | 0.31       |         |               |
|               |                                          | FI at <i>m/z</i> 91.0547                     | 91.0542                             | C <sub>7</sub> H <sub>7</sub>                    | 4.89       |         |               |
|               |                                          | FI at <i>m/z</i> 58.0660                     | 58.0651                             | C <sub>3</sub> H <sub>8</sub> N                  | 15.0       |         |               |
| CM4           | Hydroxylation isomer 2                   | PI at <i>m/z</i> 246.1490                    | 246.1489                            | C <sub>15</sub> H <sub>20</sub> O <sub>2</sub> N | 0.78       | 4.85    | pHLM and rat  |
|               |                                          | FI at <i>m/z</i> 189.0912                    | 189.0910                            | C <sub>12</sub> H <sub>13</sub> O <sub>2</sub>   | 0.95       |         |               |
|               |                                          | FI at <i>m/z</i> 161.0962                    | 161.0961                            | C <sub>11</sub> H <sub>13</sub> O                | 0.43       |         |               |
|               |                                          | FI at <i>m/z</i> 107.0496                    | 107.0491                            | C <sub>7</sub> H <sub>7</sub> O                  | 3.98       |         |               |
|               |                                          | FI at <i>m/z</i> 58.0660                     | 58.6051                             | C <sub>3</sub> H <sub>8</sub> N                  | 15.2       |         |               |
| CM5           | <i>N</i> -Dealkylation + glucuronidation | PI at <i>m/z</i> 366.1552                    | 366.1547                            | C <sub>18</sub> H <sub>24</sub> O <sub>7</sub> N | 1.15       | 5.35    | rat           |
|               |                                          | FI at <i>m/z</i> 348.1449                    | 348.1442                            | C <sub>18</sub> H <sub>22</sub> O <sub>6</sub> N | -1.73      |         |               |
|               |                                          | FI at <i>m/z</i> 330.1336                    | 330.1336                            | C <sub>18</sub> H <sub>20</sub> O <sub>5</sub> N | -0.77      |         |               |
|               |                                          | FI at <i>m/z</i> 173.0964                    | 173.0961                            | C <sub>12</sub> H <sub>13</sub> O                | 1.72       |         |               |
|               |                                          | FI at <i>m/z</i> 145.1014                    | 145.1012                            | C <sub>11</sub> H <sub>13</sub>                  | 1.29       |         |               |
|               |                                          | FI at <i>m/z</i> 129.0701                    | 129.0699                            | C <sub>10</sub> H <sub>9</sub>                   | 1.60       |         |               |
|               |                                          | FI at <i>m/z</i> 91.0548                     | 91.0542                             | C <sub>7</sub> H <sub>7</sub>                    | 6.73       |         |               |
|               |                                          | FI at <i>m/z</i> 67.0551                     | 67.0542                             | C <sub>5</sub> H <sub>7</sub>                    | 13.4       |         |               |

**Table S2.** List of *in vivo* phase I and II metabolites of 2-oxo-PCE, identified in rat urine samples and *in vitro* phase I metabolites identified in incubations using pooled human liver microsomes (pHLM), including the respective metabolite ID, metabolic reaction, masses of the precursor ion (PI) and characteristic fragment ions (FI) detected in MS<sup>2</sup>, calculated exact masses, elemental composition, calculated mass errors in parts per million (ppm), retention times (RT) in minutes, and system in which metabolites were identified. The metabolites are sorted by their mass and RT. pHLM, identified in pHLM incubations; rat, identified in rat urine samples

| Metabolite ID | Metabolic Reaction                       | Characteristic Ions Measured Accurate Masses | Calculated Exact Masses, <i>m/z</i> | Elemental Composition                            | Error, ppm | RT, min | Identified in |
|---------------|------------------------------------------|----------------------------------------------|-------------------------------------|--------------------------------------------------|------------|---------|---------------|
| 2-Oxo-PCE     | Parent compound                          | PI at <i>m/z</i> 218.1540                    | 218.1539                            | C <sub>14</sub> H <sub>20</sub> ON               | -2.21      | 5.44    | pHLM and rat  |
|               |                                          | FI at <i>m/z</i> 200.1429                    | 200.1434                            | C <sub>14</sub> H <sub>18</sub> N                | -2.54      |         |               |
|               |                                          | FI at <i>m/z</i> 173.0957                    | 173.0961                            | C <sub>12</sub> H <sub>13</sub> O                | -1.98      |         |               |
|               |                                          | FI at <i>m/z</i> 155.0851                    | 155.0855                            | C <sub>12</sub> H <sub>11</sub>                  | -3.06      |         |               |
|               |                                          | FI at <i>m/z</i> 145.1009                    | 145.1012                            | C <sub>11</sub> H <sub>13</sub>                  | -2.18      |         |               |
|               |                                          | FI at <i>m/z</i> 129.0697                    | 129.0699                            | C <sub>10</sub> H <sub>9</sub>                   | -1.12      |         |               |
|               |                                          | FI at <i>m/z</i> 117.0699                    | 117.0699                            | C <sub>9</sub> H <sub>9</sub>                    | -0.12      |         |               |
|               |                                          | FI at <i>m/z</i> 91.0545                     | 91.0542                             | C <sub>7</sub> H <sub>7</sub>                    | 3.38       |         |               |
|               |                                          | FI at <i>m/z</i> 67.0549                     | 67.0542                             | C <sub>5</sub> H <sub>7</sub>                    | 9.37       |         |               |
| EM1           | <i>N</i> -Dealkylation                   | PI at <i>m/z</i> 190.1225                    | 190.1226                            | C <sub>12</sub> H <sub>16</sub> ON               | -0.78      | 5.04    | pHLM and rat  |
|               |                                          | FI at <i>m/z</i> 173.0961                    | 173.0961                            | C <sub>12</sub> H <sub>13</sub> O                | 0.14       |         |               |
|               |                                          | FI at <i>m/z</i> 155.0854                    | 155.0855                            | C <sub>12</sub> H <sub>11</sub>                  | -0.60      |         |               |
|               |                                          | FI at <i>m/z</i> 145.1012                    | 145.1012                            | C <sub>11</sub> H <sub>13</sub>                  | 0.03       |         |               |
|               |                                          | FI at <i>m/z</i> 129.0700                    | 129.0699                            | C <sub>10</sub> H <sub>9</sub>                   | 0.89       |         |               |
|               |                                          | FI at <i>m/z</i> 117.0701                    | 117.0699                            | C <sub>9</sub> H <sub>9</sub>                    | 2.29       |         |               |
|               |                                          | FI at <i>m/z</i> 91.0547                     | 91.0542                             | C <sub>7</sub> H <sub>7</sub>                    | 5.65       |         |               |
|               |                                          | FI at <i>m/z</i> 67.0550                     | 67.0542                             | C <sub>5</sub> H <sub>7</sub>                    | 11.6       |         |               |
| EM2           | Hydroxylation + oxidation to a ketone    | PI at <i>m/z</i> 232.1333                    | 232.1332                            | C <sub>14</sub> H <sub>18</sub> O <sub>2</sub> N | 0.61       | 4.75    | rat           |
|               |                                          | FI at <i>m/z</i> 187.0754                    | 187.0754                            | C <sub>12</sub> H <sub>11</sub> O <sub>2</sub>   | 0.28       |         |               |
|               |                                          | FI at <i>m/z</i> 159.0805                    | 159.0804                            | C <sub>11</sub> H <sub>11</sub> O                | 0.11       |         |               |
|               |                                          | FI at <i>m/z</i> 91.0547                     | 91.0542                             | C <sub>7</sub> H <sub>7</sub>                    | 5.48       |         |               |
| EM3           | Hydroxylation isomer 1                   | PI at <i>m/z</i> 234.1491                    | 234.1489                            | C <sub>14</sub> H <sub>20</sub> O <sub>2</sub> N | 1.21       | 4.11    | pHLM and rat  |
|               |                                          | FI at <i>m/z</i> 216.1389                    | 216.1383                            | C <sub>14</sub> H <sub>18</sub> ON               | 2.96       |         |               |
|               |                                          | FI at <i>m/z</i> 189.0910                    | 189.0910                            | C <sub>12</sub> H <sub>13</sub> O <sub>2</sub>   | -0.01      |         |               |
|               |                                          | FI at <i>m/z</i> 171.0805                    | 171.0804                            | C <sub>12</sub> H <sub>11</sub> O                | 0.37       |         |               |
|               |                                          | FI at <i>m/z</i> 161.0963                    | 161.0961                            | C <sub>11</sub> H <sub>13</sub> O                | 1.57       |         |               |
|               |                                          | FI at <i>m/z</i> 143.0856                    | 143.0855                            | C <sub>11</sub> H <sub>11</sub>                  | 0.84       |         |               |
|               |                                          | FI at <i>m/z</i> 129.0701                    | 129.0699                            | C <sub>10</sub> H <sub>9</sub>                   | 1.84       |         |               |
|               |                                          | FI at <i>m/z</i> 91.0548                     | 91.0542                             | C <sub>7</sub> H <sub>7</sub>                    | 6.23       |         |               |
| EM4           | Hydroxylation isomer 2                   | PI at <i>m/z</i> 234.1490                    | 234.1489                            | C <sub>14</sub> H <sub>20</sub> O <sub>2</sub> N | 0.63       | 4.62    | pHLM and rat  |
|               |                                          | FI at <i>m/z</i> 216.1381                    | 216.1383                            | C <sub>14</sub> H <sub>18</sub> ON               | -0.84      |         |               |
|               |                                          | FI at <i>m/z</i> 189.0912                    | 189.0910                            | C <sub>12</sub> H <sub>13</sub> O <sub>2</sub>   | 1..12      |         |               |
|               |                                          | FI at <i>m/z</i> 171.0805                    | 171.0804                            | C <sub>12</sub> H <sub>11</sub> O                | 0.28       |         |               |
|               |                                          | FI at <i>m/z</i> 161.0961                    | 161.0961                            | C <sub>11</sub> H <sub>13</sub> O                | -0.23      |         |               |
|               |                                          | FI at <i>m/z</i> 143.0856                    | 143.0855                            | C <sub>11</sub> H <sub>11</sub>                  | 0.84       |         |               |
|               |                                          | FI at <i>m/z</i> 129.0701                    | 129.0699                            | C <sub>10</sub> H <sub>9</sub>                   | 1.47       |         |               |
|               |                                          | FI at <i>m/z</i> 91.0548                     | 91.0542                             | C <sub>7</sub> H <sub>7</sub>                    | 6.57       |         |               |
| EM5           | <i>N</i> -Dealkylation + glucuronidation | PI at <i>m/z</i> 366.1546                    | 366.1547                            | C <sub>18</sub> H <sub>24</sub> O <sub>7</sub> N | -0.26      | 5.20    | rat           |
|               |                                          | FI at <i>m/z</i> 348.1444                    | 348.1442                            | C <sub>18</sub> H <sub>22</sub> O <sub>6</sub> N | 0.61       |         |               |
|               |                                          | FI at <i>m/z</i> 330.1329                    | 330.1336                            | C <sub>18</sub> H <sub>20</sub> O <sub>5</sub> N | -2.01      |         |               |
|               |                                          | FI at <i>m/z</i> 173.0963                    | 173.0961                            | C <sub>12</sub> H <sub>13</sub> O                | 0.93       |         |               |
|               |                                          | FI at <i>m/z</i> 145.1012                    | 145.1012                            | C <sub>11</sub> H <sub>13</sub>                  | 0.45       |         |               |
|               |                                          | FI at <i>m/z</i> 129.0703                    | 129.0699                            | C <sub>10</sub> H <sub>9</sub>                   | 3.14       |         |               |
|               |                                          | FI at <i>m/z</i> 91.0548                     | 91.0542                             | C <sub>7</sub> H <sub>7</sub>                    | 6.32       |         |               |
|               |                                          | FI at <i>m/z</i> 67.0550                     | 67.0542                             | C <sub>5</sub> H <sub>7</sub>                    | 11.9       |         |               |

**Table S3.** List of *in vivo* phase I and II metabolites of 2-oxo-PCiP, identified in rat urine samples and *in vitro* phase I metabolites identified in incubations using pooled human liver microsomes (pHLM), including the respective metabolite ID, metabolic reaction, masses of the precursor ion (PI) and characteristic fragment ions (FI) detected in MS<sup>2</sup>, calculated exact masses, elemental composition, calculated mass errors in parts per million (ppm), retention times (RT) in minutes, and system in which metabolites were identified. The metabolites are sorted by their mass and RT. pHLM, identified in pHLM incubations; rat, identified in rat urine samples

| Metabolite ID | Metabolic Reaction                             | Characteristic Ions Measured Accurate Masses | Calculated Exact Masses, <i>m/z</i> | Elemental Composition                            | Error, ppm | RT, min | Identified in |
|---------------|------------------------------------------------|----------------------------------------------|-------------------------------------|--------------------------------------------------|------------|---------|---------------|
| 2-Oxo-PCiP    | Parent compound                                | PI at <i>m/z</i> 232.1690                    | 232.1696                            | C <sub>15</sub> H <sub>22</sub> ON               | -2.71      | 5.95    | pHLM and rat  |
|               |                                                | FI at <i>m/z</i> 214.1596                    | 214.1590                            | C <sub>15</sub> H <sub>20</sub> N                | 2.50       |         |               |
|               |                                                | FI at <i>m/z</i> 173.0958                    | 173.0961                            | C <sub>12</sub> H <sub>13</sub> O                | -1.54      |         |               |
|               |                                                | FI at <i>m/z</i> 155.0852                    | 155.0855                            | C <sub>12</sub> H <sub>11</sub>                  | -2.17      |         |               |
|               |                                                | FI at <i>m/z</i> 145.1009                    | 145.1012                            | C <sub>11</sub> H <sub>13</sub>                  | -2.08      |         |               |
|               |                                                | FI at <i>m/z</i> 129.0697                    | 129.0699                            | C <sub>10</sub> H <sub>9</sub>                   | -1.00      |         |               |
|               |                                                | FI at <i>m/z</i> 117.0700                    | 117.0699                            | C <sub>9</sub> H <sub>9</sub>                    | 0.66       |         |               |
|               |                                                | FI at <i>m/z</i> 91.0546                     | 91.0542                             | C <sub>7</sub> H <sub>7</sub>                    | 3.72       |         |               |
|               |                                                | FI at <i>m/z</i> 60.0815                     | 60.0808                             | C <sub>3</sub> H <sub>10</sub> N                 | 12.1       |         |               |
| IM1           | <i>N</i> -Dealkylation                         | PI at <i>m/z</i> 190.1229                    | 190.1226                            | C <sub>12</sub> H <sub>16</sub> ON               | 1.49       | 5.03    | pHLM and rat  |
|               |                                                | FI at <i>m/z</i> 173.0962                    | 173.0961                            | C <sub>12</sub> H <sub>13</sub> O                | 0.66       |         |               |
|               |                                                | FI at <i>m/z</i> 155.0856                    | 155.0855                            | C <sub>12</sub> H <sub>11</sub>                  | 0.29       |         |               |
|               |                                                | FI at <i>m/z</i> 145.1012                    | 145.1012                            | C <sub>11</sub> H <sub>13</sub>                  | 0.45       |         |               |
|               |                                                | FI at <i>m/z</i> 129.0701                    | 129.0699                            | C <sub>10</sub> H <sub>9</sub>                   | 1.48       |         |               |
|               |                                                | FI at <i>m/z</i> 117.0702                    | 117.0699                            | C <sub>9</sub> H <sub>9</sub>                    | 2.42       |         |               |
|               |                                                | FI at <i>m/z</i> 91.0548                     | 91.0542                             | C <sub>7</sub> H <sub>7</sub>                    | 6.07       |         |               |
|               |                                                | FI at <i>m/z</i> 67.0550                     | 67.0542                             | C <sub>5</sub> H <sub>7</sub>                    | 12.1       |         |               |
| IM2           | <i>N</i> -Dealkylation + hydroxylation         | PI at <i>m/z</i> 206.1175                    | 206.1176                            | C <sub>12</sub> H <sub>16</sub> O <sub>2</sub> N | -0.38      | 4.78    | pHLM and rat  |
|               |                                                | FI at <i>m/z</i> 189.0910                    | 189.0910                            | C <sub>12</sub> H <sub>13</sub> O <sub>2</sub>   | -0.01      |         |               |
|               |                                                | FI at <i>m/z</i> 171.0804                    | 171.0804                            | C <sub>12</sub> H <sub>11</sub> O                | 0.02       |         |               |
|               |                                                | FI at <i>m/z</i> 161.0961                    | 161.0961                            | C <sub>11</sub> H <sub>13</sub> O                | -0.04      |         |               |
|               |                                                | FI at <i>m/z</i> 143.0856                    | 143.0855                            | C <sub>11</sub> H <sub>11</sub>                  | 0.31       |         |               |
|               |                                                | FI at <i>m/z</i> 129.0701                    | 129.0699                            | C <sub>10</sub> H <sub>9</sub>                   | 1.37       |         |               |
|               |                                                | FI at <i>m/z</i> 91.0547                     | 91.0542                             | C <sub>7</sub> H <sub>7</sub>                    | 5.64       |         |               |
| IM3           | Hydroxylation isomer 1 + oxidation to a ketone | PI at <i>m/z</i> 246.1490                    | 246.1489                            | C <sub>15</sub> H <sub>20</sub> O <sub>2</sub> N | 0.66       | 5.22    | rat           |
|               |                                                | FI at <i>m/z</i> 187.0755                    | 187.0754                            | C <sub>12</sub> H <sub>11</sub> O <sub>2</sub>   | 0.77       |         |               |
|               |                                                | FI at <i>m/z</i> 159.0805                    | 159.0804                            | C <sub>11</sub> H <sub>11</sub> O                | 0.40       |         |               |
|               |                                                | FI at <i>m/z</i> 91.0547                     | 91.0542                             | C <sub>7</sub> H <sub>7</sub>                    | 5.48       |         |               |
|               |                                                | FI at <i>m/z</i> 60.0817                     | 60.0808                             | C <sub>3</sub> H <sub>10</sub> N                 | 14.6       |         |               |
| IM4           | Hydroxylation isomer 1                         | PI at <i>m/z</i> 248.1644                    | 248.1645                            | C <sub>12</sub> H <sub>22</sub> O <sub>2</sub> N | -0.61      | 4.75    | pHLM and rat  |
|               |                                                | FI at <i>m/z</i> 230.1541                    | 230.1539                            | C <sub>12</sub> H <sub>20</sub> ON               | 0.81       |         |               |
|               |                                                | FI at <i>m/z</i> 189.0912                    | 189.0910                            | C <sub>12</sub> H <sub>13</sub> O <sub>2</sub>   | 0.87       |         |               |
|               |                                                | FI at <i>m/z</i> 171.0805                    | 171.0804                            | C <sub>12</sub> H <sub>11</sub> O                | 0.28       |         |               |
|               |                                                | FI at <i>m/z</i> 143.0856                    | 143.0855                            | C <sub>11</sub> H <sub>11</sub>                  | 0.84       |         |               |
|               |                                                | FI at <i>m/z</i> 91.0548                     | 91.0542                             | C <sub>7</sub> H <sub>7</sub>                    | 6.15       |         |               |
|               |                                                | FI at <i>m/z</i> 60.0817                     | 60.0808                             | C <sub>3</sub> H <sub>10</sub> N                 | 15.1       |         |               |
| IM5           | Hydroxylation isomer 2                         | PI at <i>m/z</i> 248.1645                    | 248.1645                            | C <sub>15</sub> H <sub>22</sub> O <sub>2</sub> N | 0.23       | 5.04    | pHLM and rat  |
|               |                                                | FI at <i>m/z</i> 189.0910                    | 189.0910                            | C <sub>12</sub> H <sub>13</sub> O                | -0.18      |         |               |
|               |                                                | FI at <i>m/z</i> 161.0961                    | 161.0961                            | C <sub>11</sub> H <sub>13</sub> O                | -0.09      |         |               |
|               |                                                | FI at <i>m/z</i> 107.0496                    | 107.0491                            | C <sub>7</sub> H <sub>7</sub> O                  | 4.30       |         |               |
|               |                                                | FI at <i>m/z</i> 60.0816                     | 60.0808                             | C <sub>3</sub> H <sub>10</sub> N                 | 14.2       |         |               |

|     |                                                |                    |          |                                                  |       |      |              |
|-----|------------------------------------------------|--------------------|----------|--------------------------------------------------|-------|------|--------------|
| IM6 | Hydroxylation<br>isomer 3                      | PI at m/z 248.1646 | 248.1645 | C <sub>15</sub> H <sub>22</sub> O <sub>2</sub> N | 0.55  | 5.58 | pHLM and rat |
|     |                                                | FI at m/z 230.1541 | 230.1539 | C <sub>15</sub> H <sub>20</sub> ON               | 0.69  |      |              |
|     |                                                | FI at m/z 173.0963 | 173.0961 | C <sub>12</sub> H <sub>13</sub> O                | 1.02  |      |              |
|     |                                                | FI at m/z 145.1013 | 145.1012 | C <sub>11</sub> H <sub>13</sub>                  | 0.66  |      |              |
|     |                                                | FI at m/z 129.0700 | 129.0699 | C <sub>10</sub> H <sub>9</sub>                   | 1.13  |      |              |
|     |                                                | FI at m/z 91.0548  | 91.0542  | C <sub>7</sub> H <sub>7</sub>                    | 6.23  |      |              |
|     |                                                | FI at m/z 76.0764  | 76.0757  | C <sub>3</sub> H <sub>10</sub> ON                | 9.24  |      |              |
|     |                                                | FI at m/z 58.0660  | 58.0651  | C <sub>3</sub> H <sub>8</sub> N                  | 15.4  |      |              |
| IM7 | Dihydroxylation                                | PI at m/z 264.1593 | 264.1645 | C <sub>15</sub> H <sub>22</sub> O <sub>3</sub> N | -0.45 | 4.61 | rat          |
|     |                                                | FI at m/z 246.1490 | 246.1489 | C <sub>15</sub> H <sub>20</sub> O <sub>2</sub> N | 0.66  |      |              |
|     |                                                | FI at m/z 228.1383 | 228.1383 | C <sub>15</sub> H <sub>18</sub> ON               | -0.07 |      |              |
|     |                                                | FI at m/z 189.0908 | 189.0910 | C <sub>12</sub> H <sub>13</sub> O <sub>2</sub>   | -1.14 |      |              |
|     |                                                | FI at m/z 171.0805 | 171.0804 | C <sub>12</sub> H <sub>11</sub> O                | 0.37  |      |              |
|     |                                                | FI at m/z 143.0856 | 143.0855 | C <sub>11</sub> H <sub>11</sub>                  | 0.63  |      |              |
|     |                                                | FI at m/z 76.0764  | 76.0757  | C <sub>3</sub> H <sub>10</sub> ON                | 9.94  |      |              |
|     |                                                | FI at m/z 58.0660  | 58.0651  | C <sub>3</sub> H <sub>8</sub> N                  | 15.4  |      |              |
| IM8 | N-Dealkylation +<br>glucuronidation            | PI at m/z 366.1543 | 366.1547 | C <sub>18</sub> H <sub>24</sub> O <sub>7</sub> N | -1.18 | 5.22 | rat          |
|     |                                                | FI at m/z 348.1441 | 348.1442 | C <sub>18</sub> H <sub>22</sub> O <sub>6</sub> N | -0.08 |      |              |
|     |                                                | FI at m/z 330.1340 | 330.1336 | C <sub>18</sub> H <sub>20</sub> O <sub>5</sub> N | 1.17  |      |              |
|     |                                                | FI at m/z 173.0962 | 173.0961 | C <sub>12</sub> H <sub>13</sub> O                | 0.47  |      |              |
|     |                                                | FI at m/z 145.1012 | 145.1012 | C <sub>11</sub> H <sub>13</sub>                  | 0.14  |      |              |
|     |                                                | FI at m/z 129.0701 | 129.0699 | C <sub>10</sub> H <sub>9</sub>                   | 1.58  |      |              |
|     |                                                | FI at m/z 91.0548  | 91.0542  | C <sub>7</sub> H <sub>7</sub>                    | 6.58  |      |              |
| IM9 | Hydroxylation<br>isomer 3 +<br>glucuronidation | PI at m/z 424.1966 | 424.1966 | C <sub>21</sub> H <sub>30</sub> O <sub>8</sub> N | 0.00  | 5.24 | rat          |
|     |                                                | FI at m/z 230.1537 | 230.1539 | C <sub>15</sub> H <sub>20</sub> ON               | -0.85 |      |              |
|     |                                                | FI at m/z 173.0963 | 173.0961 | C <sub>12</sub> H <sub>13</sub> O                | 1.28  |      |              |
|     |                                                | FI at m/z 145.1013 | 145.1012 | C <sub>12</sub> H <sub>13</sub> O                | 0.72  |      |              |
|     |                                                | FI at m/z 129.0703 | 129.0699 | C <sub>10</sub> H <sub>9</sub>                   | 3.06  |      |              |
|     |                                                | FI at m/z 91.0548  | 91.0542  | C <sub>7</sub> H <sub>7</sub>                    | 6.62  |      |              |
|     |                                                | FI at m/z 76.0764  | 76.0757  | C <sub>3</sub> H <sub>10</sub> ON                | 8.90  |      |              |

**Table S4.** List of *in vivo* phase I and II metabolites of 2-oxo-PCMe, identified in rat urine samples and *in vitro* phase I metabolites identified in incubations using pooled human liver microsomes (pHLM), including the respective metabolite ID, metabolic reaction, masses of the precursor ion (PI) and characteristic fragment ions (FI) detected in MS<sup>2</sup>, calculated exact masses, elemental composition, calculated mass errors in parts per million (ppm), retention times (RT) in minutes, and system in which metabolites were identified. The metabolites are sorted by their mass and RT. pHLM, identified in pHLM incubations; rat, identified in rat urine samples

| Metabolite ID | Metabolic Reaction                             | Characteristic Ions Measured Accurate Masses | Calculated Exact Masses, <i>m/z</i> | Elemental Composition                            | Error, ppm | RT, min | Identified in |
|---------------|------------------------------------------------|----------------------------------------------|-------------------------------------|--------------------------------------------------|------------|---------|---------------|
| 2-Oxo-PCMe    | Parent compound                                | PI at <i>m/z</i> 204.1383                    | 204.1383                            | C <sub>13</sub> H <sub>18</sub> ON               | 0.15       | 5.10    | pHLM and rat  |
|               |                                                | FI at <i>m/z</i> 186.1277                    | 186.1277                            | C <sub>13</sub> H <sub>16</sub> N                | 0.03       |         |               |
|               |                                                | FI at <i>m/z</i> 173.0962                    | 173.0961                            | C <sub>12</sub> H <sub>13</sub> O                | 0.75       |         |               |
|               |                                                | FI at <i>m/z</i> 155.0855                    | 155.0855                            | C <sub>12</sub> H <sub>11</sub>                  | -0.01      |         |               |
|               |                                                | FI at <i>m/z</i> 145.1012                    | 145.1012                            | C <sub>11</sub> H <sub>13</sub>                  | 0.45       |         |               |
|               |                                                | FI at <i>m/z</i> 129.0700                    | 129.0699                            | C <sub>10</sub> H <sub>9</sub>                   | 1.13       |         |               |
|               |                                                | FI at <i>m/z</i> 117.0702                    | 117.0699                            | C <sub>9</sub> H <sub>9</sub>                    | 2.87       |         |               |
|               |                                                | FI at <i>m/z</i> 91.0548                     | 91.0542                             | C <sub>7</sub> H <sub>7</sub>                    | 6.07       |         |               |
| MM1           | <i>N</i> -Dealkylation                         | FI at <i>m/z</i> 67.0551                     | 67.0542                             | C <sub>5</sub> H <sub>7</sub>                    | 12.3       | 5.00    | pHLM and rat  |
|               |                                                | PI at <i>m/z</i> 190.1222                    | 190.1226                            | C <sub>12</sub> H <sub>16</sub> ON               | -2.28      |         |               |
|               |                                                | FI at <i>m/z</i> 173.0962                    | 173.0961                            | C <sub>12</sub> H <sub>13</sub> O                | 0.84       |         |               |
|               |                                                | FI at <i>m/z</i> 155.0856                    | 155.0855                            | C <sub>12</sub> H <sub>11</sub>                  | 0.48       |         |               |
|               |                                                | FI at <i>m/z</i> 145.1013                    | 145.1012                            | C <sub>11</sub> H <sub>13</sub>                  | 0.69       |         |               |
|               |                                                | FI at <i>m/z</i> 129.0701                    | 129.0699                            | C <sub>10</sub> H <sub>9</sub>                   | 1.72       |         |               |
|               |                                                | FI at <i>m/z</i> 117.0703                    | 117.0699                            | C <sub>9</sub> H <sub>9</sub>                    | 3.33       |         |               |
|               |                                                | FI at <i>m/z</i> 91.0548                     | 91.0542                             | C <sub>7</sub> H <sub>7</sub>                    | 6.23       |         |               |
| MM2           | <i>N</i> -Dealkylation + hydroxylation         | FI at <i>m/z</i> 67.0548                     | 67.0542                             | C <sub>5</sub> H <sub>7</sub>                    | 12.5       | 4.82    | pHLM and rat  |
|               |                                                | PI at <i>m/z</i> 206.1181                    | 206.1176                            | C <sub>12</sub> H <sub>16</sub> O <sub>2</sub> N | 2.73       |         |               |
|               |                                                | FI at <i>m/z</i> 189.0912                    | 189.0910                            | C <sub>12</sub> H <sub>13</sub> O <sub>2</sub>   | 0.87       |         |               |
|               |                                                | FI at <i>m/z</i> 171.0805                    | 171.0804                            | C <sub>12</sub> H <sub>11</sub> O                | 0.55       |         |               |
|               |                                                | FI at <i>m/z</i> 161.0962                    | 161.0961                            | C <sub>11</sub> H <sub>13</sub> O                | 0.71       |         |               |
|               |                                                | FI at <i>m/z</i> 143.0857                    | 143.0855                            | C <sub>11</sub> H <sub>11</sub>                  | 0.95       |         |               |
|               |                                                | FI at <i>m/z</i> 129.0701                    | 129.0699                            | C <sub>10</sub> H <sub>9</sub>                   | 1.48       |         |               |
|               |                                                | FI at <i>m/z</i> 117.0702                    | 117.0699                            | C <sub>9</sub> H <sub>9</sub>                    | 2.87       |         |               |
| MM3           | <i>N</i> -Dealkylation + hydroxylamine         | FI at <i>m/z</i> 91.0548                     | 91.0542                             | C <sub>7</sub> H <sub>7</sub>                    | 6.32       | 5.61    | rat           |
|               |                                                | FI at <i>m/z</i> 67.0548                     | 67.0542                             | C <sub>5</sub> H <sub>7</sub>                    | 8.69       |         |               |
|               |                                                | PI at <i>m/z</i> 206.1177                    | 206.1176                            | C <sub>12</sub> H <sub>16</sub> O <sub>2</sub> N | 0.88       |         |               |
|               |                                                | FI at <i>m/z</i> 188.1071                    | 188.1070                            | C <sub>12</sub> H <sub>14</sub> ON               | 0.51       |         |               |
|               |                                                | FI at <i>m/z</i> 173.0962                    | 173.0961                            | C <sub>12</sub> H <sub>13</sub> O                | 0.58       |         |               |
|               |                                                | FI at <i>m/z</i> 145.1012                    | 145.1012                            | C <sub>11</sub> H <sub>13</sub>                  | 0.13       |         |               |
|               |                                                | FI at <i>m/z</i> 129.0701                    | 129.0699                            | C <sub>10</sub> H <sub>9</sub>                   | 1.37       |         |               |
|               |                                                | FI at <i>m/z</i> 117.0702                    | 117.0699                            | C <sub>9</sub> H <sub>9</sub>                    | 2.35       |         |               |
| MM4           | Hydroxylation isomer 1 + oxidation to a ketone | FI at <i>m/z</i> 91.0548                     | 91.0542                             | C <sub>7</sub> H <sub>7</sub>                    | 5.81       | 4.61    | rat           |
|               |                                                | FI at <i>m/z</i> 67.0550                     | 67.0542                             | C <sub>5</sub> H <sub>7</sub>                    | 12.0       |         |               |
|               |                                                | PI at <i>m/z</i> 218.1172                    | 218.1176                            | C <sub>13</sub> H <sub>16</sub> O <sub>2</sub> N | -1.48      |         |               |
|               |                                                | FI at <i>m/z</i> 187.0751                    | 187.0754                            | C <sub>12</sub> H <sub>11</sub> O <sub>2</sub>   | -1.27      |         |               |
| MM5           | Hydroxylation isomer 1                         | FI at <i>m/z</i> 159.0802                    | 159.0804                            | C <sub>11</sub> H <sub>11</sub> O                | -1.23      | 4.49    | pHLM and rat  |
|               |                                                | FI at <i>m/z</i> 91.0546                     | 91.0542                             | C <sub>7</sub> H <sub>7</sub>                    | 4.56       |         |               |
|               |                                                | PI at <i>m/z</i> 220.1330                    | 220.1332                            | C <sub>13</sub> H <sub>18</sub> O <sub>2</sub> N | -0.88      |         |               |
|               |                                                | FI at <i>m/z</i> 202.1223                    | 202.1226                            | C <sub>13</sub> H <sub>16</sub> ON               | -1.61      |         |               |
|               |                                                | FI at <i>m/z</i> 189.0910                    | 189.0910                            | C <sub>12</sub> H <sub>13</sub> O <sub>2</sub>   | -0.01      |         |               |
|               |                                                | FI at <i>m/z</i> 171.0804                    | 171.0804                            | C <sub>12</sub> H <sub>11</sub> O                | -0.07      |         |               |
|               |                                                | FI at <i>m/z</i> 143.0856                    | 143.0855                            | C <sub>11</sub> H <sub>11</sub>                  | 0.52       |         |               |
|               |                                                | FI at <i>m/z</i> 91.0548                     | 91.0542                             | C <sub>7</sub> H <sub>7</sub>                    | 5.98       |         |               |

|     |                                                      |                    |          |                                                  |       |      |              |
|-----|------------------------------------------------------|--------------------|----------|--------------------------------------------------|-------|------|--------------|
| MM6 | Hydroxylation<br>isomer 2                            | PI at m/z 220.1335 | 220.1332 | C <sub>13</sub> H <sub>18</sub> O <sub>2</sub> N | 1.27  | 4.70 | pHLM and rat |
|     |                                                      | FI at m/z 189.0911 | 189.0910 | C <sub>12</sub> H <sub>13</sub> O <sub>2</sub>   | 0.55  |      |              |
|     |                                                      | FI at m/z 161.0961 | 161.0961 | C <sub>11</sub> H <sub>13</sub> O                | 0.34  |      |              |
|     |                                                      | FI at m/z 107.0496 | 107.0491 | C <sub>7</sub> H <sub>7</sub> O                  | 4.13  |      |              |
|     |                                                      | FI at m/z 67.0551  | 67.0542  | C <sub>5</sub> H <sub>7</sub>                    | 12.4  |      |              |
| MM7 | N-Dealkylation +<br>acetylation                      | PI at m/z 232.1341 | 232.1332 | C <sub>14</sub> H <sub>18</sub> O <sub>2</sub> N | 3.83  | 6.90 | rat          |
|     |                                                      | FI at m/z 190.1231 | 190.1226 | C <sub>12</sub> H <sub>16</sub> ON               | 2.62  |      |              |
|     |                                                      | FI at m/z 173.0962 | 173.0961 | C <sub>12</sub> H <sub>13</sub> O                | 0.75  |      |              |
|     |                                                      | FI at m/z 155.0853 | 155.0855 | C <sub>12</sub> H <sub>11</sub>                  | -1.58 |      |              |
|     |                                                      | FI at m/z 145.1013 | 145.1012 | C <sub>11</sub> H <sub>13</sub>                  | 0.66  |      |              |
|     |                                                      | FI at m/z 129.0697 | 129.0699 | C <sub>10</sub> H <sub>9</sub>                   | -1.00 |      |              |
|     |                                                      | FI at m/z 91.0548  | 91.0542  | C <sub>7</sub> H <sub>7</sub>                    | 6.23  |      |              |
|     |                                                      | FI at m/z 67.0550  | 67.0542  | C <sub>5</sub> H <sub>7</sub>                    | 12.0  |      |              |
| MM8 | N-Dealkylation +<br>glucuronidation                  | PI at m/z 366.1552 | 366.1547 | C <sub>18</sub> H <sub>24</sub> O <sub>7</sub> N | 1.15  | 5.25 | rat          |
|     |                                                      | FI at m/z 348.1444 | 348.1442 | C <sub>18</sub> H <sub>22</sub> O <sub>6</sub> N | 0.70  |      |              |
|     |                                                      | FI at m/z 330.1332 | 330.1336 | C <sub>18</sub> H <sub>20</sub> O <sub>5</sub> N | -1.28 |      |              |
|     |                                                      | FI at m/z 173.0963 | 173.0961 | C <sub>12</sub> H <sub>13</sub> O                | 1.11  |      |              |
|     |                                                      | FI at m/z 155.0856 | 155.0855 | C <sub>12</sub> H <sub>11</sub>                  | 0.19  |      |              |
|     |                                                      | FI at m/z 145.1013 | 145.1012 | C <sub>11</sub> H <sub>13</sub>                  | 0.76  |      |              |
|     |                                                      | FI at m/z 129.0701 | 129.0699 | C <sub>10</sub> H <sub>9</sub>                   | 1.37  |      |              |
|     |                                                      | FI at m/z 91.0548  | 91.0542  | C <sub>7</sub> H <sub>7</sub>                    | 6.57  |      |              |
|     |                                                      | FI at m/z 67.0551  | 67.0542  | C <sub>5</sub> H <sub>7</sub>                    | 12.9  |      |              |
| MM9 | N-Dealkylation +<br>hydroxylation<br>glucuronidation | PI at m/z 382.1491 | 382.1469 | C <sub>18</sub> H <sub>24</sub> O <sub>8</sub> N | -1.52 | 4.37 | rat          |
|     |                                                      | FI at m/z 364.1381 | 364.1391 | C <sub>18</sub> H <sub>22</sub> O <sub>7</sub> N | -2.59 |      |              |
|     |                                                      | FI at m/z 171.0803 | 171.0804 | C <sub>12</sub> H <sub>11</sub> O                | -0.91 |      |              |
|     |                                                      | FI at m/z 161.0960 | 161.0961 | C <sub>11</sub> H <sub>13</sub> O                | -0.79 |      |              |
|     |                                                      | FI at m/z 143.0856 | 143.0855 | C <sub>11</sub> H <sub>11</sub>                  | 0.29  |      |              |
|     |                                                      | FI at m/z 91.0553  | 91.0542  | C <sub>7</sub> H <sub>7</sub>                    | 11.5  |      |              |

**Table S5.** List of *in vivo* phase I and II metabolites of 2-oxo-PCPr, identified in rat urine samples and *in vitro* phase I metabolites identified in incubations using pooled human liver microsomes (pHLM), including the respective metabolite ID, metabolic reaction, masses of the precursor ion (PI) and characteristic fragment ions (FI) detected in MS<sup>2</sup>, calculated exact masses, elemental composition, calculated mass errors in parts per million (ppm), retention times (RT) in minutes, and system in which metabolites were identified. The metabolites are sorted by their mass and RT. pHLM, identified in pHLM incubations; rat, identified in rat urine samples

| Metabolite ID | Metabolic Reaction                             | Characteristic Ions Measured Accurate Masses | Calculated Exact Masses, <i>m/z</i> | Elemental Composition                            | Error, ppm | RT, min | Identified in |
|---------------|------------------------------------------------|----------------------------------------------|-------------------------------------|--------------------------------------------------|------------|---------|---------------|
| 2-Oxo-PCPr    | Parent compound                                | PI at <i>m/z</i> 232.1690                    | 232.1696                            | C <sub>15</sub> H <sub>22</sub> ON               | -2.39      | 5.96    | pHLM and rat  |
|               |                                                | FI at <i>m/z</i> 214.1587                    | 214.1590                            | C <sub>15</sub> H <sub>20</sub> N                | -1.71      |         |               |
|               |                                                | FI at <i>m/z</i> 173.0958                    | 173.0961                            | C <sub>12</sub> H <sub>13</sub> O                | -1.54      |         |               |
|               |                                                | FI at <i>m/z</i> 155.0851                    | 155.0855                            | C <sub>12</sub> H <sub>11</sub>                  | -2.47      |         |               |
|               |                                                | FI at <i>m/z</i> 145.1009                    | 145.1012                            | C <sub>11</sub> H <sub>13</sub>                  | -1.87      |         |               |
|               |                                                | FI at <i>m/z</i> 129.0697                    | 129.0699                            | C <sub>10</sub> H <sub>9</sub>                   | -1.71      |         |               |
|               |                                                | FI at <i>m/z</i> 117.0700                    | 117.0699                            | C <sub>9</sub> H <sub>9</sub>                    | 1.31       |         |               |
|               |                                                | FI at <i>m/z</i> 91.0546                     | 91.0542                             | C <sub>7</sub> H <sub>7</sub>                    | 3.89       |         |               |
|               |                                                | FI at <i>m/z</i> 60.0815                     | 60.0808                             | C <sub>3</sub> H <sub>10</sub> N                 | 12.4       |         |               |
| PM1           | <i>N</i> -Dealkylation                         | PI at <i>m/z</i> 190.1223                    | 190.1226                            | C <sub>12</sub> H <sub>16</sub> ON               | -1.82      | 5.05    | pHLM and rat  |
|               |                                                | FI at <i>m/z</i> 173.0962                    | 173.0961                            | C <sub>12</sub> H <sub>13</sub> O                | 0.63       |         |               |
|               |                                                | FI at <i>m/z</i> 155.0854                    | 155.0855                            | C <sub>12</sub> H <sub>11</sub>                  | -1.05      |         |               |
|               |                                                | FI at <i>m/z</i> 145.1012                    | 145.1012                            | C <sub>11</sub> H <sub>13</sub>                  | 0.17       |         |               |
|               |                                                | FI at <i>m/z</i> 129.0700                    | 129.0699                            | C <sub>10</sub> H <sub>9</sub>                   | 0.80       |         |               |
|               |                                                | FI at <i>m/z</i> 117.0702                    | 117.0699                            | C <sub>9</sub> H <sub>9</sub>                    | 2.35       |         |               |
|               |                                                | FI at <i>m/z</i> 91.0548                     | 91.0542                             | C <sub>7</sub> H <sub>7</sub>                    | 5.99       |         |               |
|               |                                                | FI at <i>m/z</i> 67.0550                     | 67.0542                             | C <sub>5</sub> H <sub>7</sub>                    | 11.5       |         |               |
| PM2           | Hydroxylation isomer 1 + oxidation to a ketone | PI at <i>m/z</i> 246.1490                    | 246.1489                            | C <sub>15</sub> H <sub>20</sub> O <sub>2</sub> N | 0.66       | 5.37    | rat           |
|               |                                                | FI at <i>m/z</i> 228.1380                    | 228.1383                            | C <sub>15</sub> H <sub>18</sub> ON               | -1.07      |         |               |
|               |                                                | FI at <i>m/z</i> 187.0753                    | 187.0754                            | C <sub>12</sub> H <sub>11</sub> O <sub>2</sub>   | -0.53      |         |               |
|               |                                                | FI at <i>m/z</i> 159.0804                    | 159.0804                            | C <sub>11</sub> H <sub>11</sub> O                | -0.46      |         |               |
|               |                                                | FI at <i>m/z</i> 141.0698                    | 141.0699                            | C <sub>11</sub> H <sub>9</sub>                   | -0.48      |         |               |
|               |                                                | FI at <i>m/z</i> 91.0546                     | 91.0542                             | C <sub>7</sub> H <sub>7</sub>                    | 4.14       |         |               |
|               |                                                | FI at <i>m/z</i> 60.0816                     | 60.0808                             | C <sub>3</sub> H <sub>10</sub> N                 | 14.2       |         |               |
| PM3           | Hydroxylation isomer 1                         | PI at <i>m/z</i> 248.1639                    | 248.1645                            | C <sub>15</sub> H <sub>22</sub> O <sub>2</sub> N | -2.52      | 4.75    | pHLM and rat  |
|               |                                                | FI at <i>m/z</i> 230.1540                    | 230.1539                            | C <sub>15</sub> H <sub>20</sub> ON               | 0.15       |         |               |
|               |                                                | FI at <i>m/z</i> 189.0912                    | 189.0910                            | C <sub>12</sub> H <sub>13</sub> O <sub>2</sub>   | 0.87       |         |               |
|               |                                                | FI at <i>m/z</i> 171.0805                    | 171.0804                            | C <sub>12</sub> H <sub>11</sub> O                | 0.28       |         |               |
|               |                                                | FI at <i>m/z</i> 143.0857                    | 143.0855                            | C <sub>11</sub> H <sub>11</sub>                  | 0.95       |         |               |
|               |                                                | FI at <i>m/z</i> 60.0817                     | 60.0808                             | C <sub>3</sub> H <sub>10</sub> N                 | 17.8       |         |               |
| PM4           | Hydroxylation isomer 2                         | PI at <i>m/z</i> 248.1649                    | 248.1645                            | C <sub>15</sub> H <sub>22</sub> O <sub>2</sub> N | 1.41       | 5.31    | pHLM and rat  |
|               |                                                | FI at <i>m/z</i> 230.1537                    | 230.1539                            | C <sub>15</sub> H <sub>20</sub> ON               | -0.91      |         |               |
|               |                                                | FI at <i>m/z</i> 173.0963                    | 173.0961                            | C <sub>12</sub> H <sub>13</sub> O                | 1.02       |         |               |
|               |                                                | FI at <i>m/z</i> 155.0854                    | 155.0855                            | C <sub>12</sub> H <sub>11</sub>                  | -0.50      |         |               |
|               |                                                | FI at <i>m/z</i> 145.1012                    | 145.1012                            | C <sub>11</sub> H <sub>13</sub>                  | 0.34       |         |               |
|               |                                                | FI at <i>m/z</i> 129.0701                    | 129.0699                            | C <sub>10</sub> H <sub>9</sub>                   | 1.96       |         |               |
|               |                                                | FI at <i>m/z</i> 117.0702                    | 117.0699                            | C <sub>9</sub> H <sub>9</sub>                    | 2.94       |         |               |
|               |                                                | FI at <i>m/z</i> 91.0548                     | 91.0542                             | C <sub>7</sub> H <sub>7</sub>                    | 6.07       |         |               |
|               |                                                | FI at <i>m/z</i> 76.0764                     | 76.0757                             | C <sub>3</sub> H <sub>10</sub> ON                | 9.44       |         |               |
|               |                                                | FI at <i>m/z</i> 67.0550                     | 67.0542                             | C <sub>5</sub> H <sub>7</sub>                    | 12.2       |         |               |



|      |                                                       |                    |          |                                                  |       |      |              |
|------|-------------------------------------------------------|--------------------|----------|--------------------------------------------------|-------|------|--------------|
| PM5  | Hydroxylamine                                         | PI at m/z 248.1648 | 248.1645 | C <sub>15</sub> H <sub>22</sub> O <sub>2</sub> N | 1.29  | 6.21 | pHLM and rat |
|      |                                                       | FI at m/z 230.1541 | 230.1539 | C <sub>15</sub> H <sub>20</sub> ON               | 0.55  |      |              |
|      |                                                       | FI at m/z 173.0962 | 173.0961 | C <sub>12</sub> H <sub>13</sub> O                | 0.40  |      |              |
|      |                                                       | FI at m/z 155.0860 | 155.0855 | C <sub>12</sub> H <sub>11</sub>                  | 3.04  |      |              |
|      |                                                       | FI at m/z 145.1013 | 145.1012 | C <sub>11</sub> H <sub>13</sub>                  | 0.69  |      |              |
|      |                                                       | FI at m/z 129.0701 | 129.0699 | C <sub>10</sub> H <sub>9</sub>                   | 1.72  |      |              |
|      |                                                       | FI at m/z 91.0548  | 91.0542  | C <sub>7</sub> H <sub>7</sub>                    | 6.65  |      |              |
|      |                                                       | FI at m/z 67.0550  | 67.0542  | C <sub>5</sub> H <sub>7</sub>                    | 11.3  |      |              |
| PM6  | Dihydroxylation isomer 1 + monooxidation to a ketone  | PI at m/z 262.1438 | 262.1438 | C <sub>15</sub> H <sub>20</sub> O <sub>3</sub> N | 0.11  | 4.85 | rat          |
|      |                                                       | FI at m/z 244.1321 | 244.1332 | C <sub>15</sub> H <sub>18</sub> O <sub>2</sub> N | -4.61 |      |              |
|      |                                                       | FI at m/z 187.0754 | 187.0754 | C <sub>12</sub> H <sub>11</sub> O <sub>2</sub>   | 0.28  |      |              |
|      |                                                       | FI at m/z 159.0805 | 159.0804 | C <sub>11</sub> H <sub>11</sub> O                | 0.21  |      |              |
|      |                                                       | FI at m/z 76.0764  | 76.0757  | C <sub>3</sub> H <sub>10</sub> ON                | 9.64  |      |              |
| PM7  | Hydroxylation isomer 2 + oxidation to carboxylic acid | PI at m/z 262.1440 | 262.1438 | C <sub>15</sub> H <sub>20</sub> O <sub>3</sub> N | 0.69  | 5.31 | rat          |
|      |                                                       | FI at m/z 244.1338 | 244.1332 | C <sub>15</sub> H <sub>18</sub> O <sub>2</sub> N | 2.33  |      |              |
|      |                                                       | FI at m/z 173.0962 | 173.0961 | C <sub>12</sub> H <sub>13</sub> O                | 0.58  |      |              |
|      |                                                       | FI at m/z 155.0855 | 155.0855 | C <sub>12</sub> H <sub>11</sub>                  | -0.11 |      |              |
|      |                                                       | FI at m/z 145.1012 | 145.1012 | C <sub>11</sub> H <sub>13</sub>                  | 0.45  |      |              |
|      |                                                       | FI at m/z 129.0700 | 129.0699 | C <sub>10</sub> H <sub>9</sub>                   | 0.77  |      |              |
|      |                                                       | FI at m/z 117.0702 | 117.0699 | C <sub>9</sub> H <sub>9</sub>                    | 2.87  |      |              |
|      |                                                       | FI at m/z 91.0548  | 91.0542  | C <sub>7</sub> H <sub>7</sub>                    | 5.98  |      |              |
| PM8  | Dihydroxylation isomer 1                              | FI at m/z 67.0660  | 67.0542  | C <sub>5</sub> H <sub>7</sub>                    | 12.2  | 4.61 | rat          |
|      |                                                       | PI at m/z 264.1596 | 264.1594 | C <sub>15</sub> H <sub>22</sub> O <sub>3</sub> N | 0.82  |      |              |
|      |                                                       | FI at m/z 246.1490 | 246.1489 | C <sub>15</sub> H <sub>20</sub> O <sub>2</sub> N | 0.72  |      |              |
|      |                                                       | FI at m/z 228.1382 | 228.1383 | C <sub>15</sub> H <sub>18</sub> ON               | -0.60 |      |              |
|      |                                                       | FI at m/z 189.0911 | 189.0910 | C <sub>12</sub> H <sub>13</sub> O <sub>2</sub>   | 0.31  |      |              |
|      |                                                       | FI at m/z 171.0805 | 171.0804 | C <sub>12</sub> H <sub>11</sub> O                | 0.55  |      |              |
|      |                                                       | FI at m/z 143.0857 | 143.0855 | C <sub>11</sub> H <sub>11</sub>                  | 1.06  |      |              |
|      |                                                       | FI at m/z 76.0764  | 76.0757  | C <sub>3</sub> H <sub>10</sub> ON                | 9.94  |      |              |
| PM9  | Dihydroxylation isomer 2                              | PI at m/z 264.1595 | 264.1594 | C <sub>15</sub> H <sub>22</sub> O <sub>3</sub> N | 0.36  | 5.09 | rat          |
|      |                                                       | FI at m/z 246.1490 | 246.1489 | C <sub>15</sub> H <sub>20</sub> O <sub>2</sub> N | 0.72  |      |              |
|      |                                                       | FI at m/z 189.0910 | 189.0910 | C <sub>12</sub> H <sub>13</sub> O <sub>2</sub>   | -0.01 |      |              |
|      |                                                       | FI at m/z 161.0961 | 161.0961 | C <sub>11</sub> H <sub>13</sub> O                | 0.15  |      |              |
|      |                                                       | FI at m/z 107.0495 | 107.0491 | C <sub>7</sub> H <sub>7</sub> O                  | 3.77  |      |              |
|      |                                                       | FI at m/z 76.0764  | 76.0757  | C <sub>3</sub> H <sub>10</sub> ON                | 9.45  |      |              |
| PM10 | N-Dealkylation + glucuronidation                      | PI at m/z 366.1547 | 366.1547 | C <sub>18</sub> H <sub>24</sub> O <sub>7</sub> N | -0.01 | 5.29 | rat          |
|      |                                                       | FI at m/z 348.1437 | 348.1442 | C <sub>18</sub> H <sub>22</sub> O <sub>6</sub> N | -1.22 |      |              |
|      |                                                       | FI at m/z 330.1341 | 330.1336 | C <sub>18</sub> H <sub>20</sub> O <sub>5</sub> N | 1.50  |      |              |
|      |                                                       | FI at m/z 173.0962 | 173.0961 | C <sub>12</sub> H <sub>13</sub> O                | 0.66  |      |              |
|      |                                                       | FI at m/z 145.1013 | 145.1012 | C <sub>11</sub> H <sub>13</sub>                  | 0.66  |      |              |
|      |                                                       | FI at m/z 129.0701 | 129.0699 | C <sub>10</sub> H <sub>9</sub>                   | 1.72  |      |              |
|      |                                                       | FI at m/z 91.0548  | 91.0542  | C <sub>7</sub> H <sub>7</sub>                    | 6.23  |      |              |
| PM11 | Hydroxylation isomer 2 + glucuronidation              | PI at m/z 424.1964 | 424.1966 | C <sub>21</sub> H <sub>30</sub> O <sub>8</sub> N | -0.36 | 5.24 | rat          |
|      |                                                       | FI at m/z 248.1640 | 248.1645 | C <sub>15</sub> H <sub>22</sub> O <sub>2</sub> N | -1.85 |      |              |
|      |                                                       | FI at m/z 230.1539 | 230.1539 | C <sub>15</sub> H <sub>20</sub> ON               | -0.31 |      |              |
|      |                                                       | FI at m/z 173.0965 | 173.0961 | C <sub>12</sub> H <sub>13</sub> O                | 2.52  |      |              |
|      |                                                       | FI at m/z 145.1012 | 145.1012 | C <sub>11</sub> H <sub>13</sub>                  | 0.34  |      |              |
|      |                                                       | FI at m/z 129.0702 | 129.0699 | C <sub>10</sub> H <sub>9</sub>                   | 2.19  |      |              |
|      |                                                       | FI at m/z 91.0548  | 91.0542  | C <sub>7</sub> H <sub>7</sub>                    | 6.23  |      |              |
|      |                                                       | FI at m/z 76.0764  | 76.0757  | C <sub>3</sub> H <sub>10</sub> ON                | 9.73  |      |              |

**Table S6.** Parent compounds and metabolites of five deschloroketamine derivatives detected by GC-MS, including masses of precursor ions (PI), elemental composition, and masses of characteristic fragment ions (FI). AC, acetylated.

| Parent compound or metabolite | PI mass, <i>m/z</i> | RI   | Elemental composition                           | Characteristic FI                          |
|-------------------------------|---------------------|------|-------------------------------------------------|--------------------------------------------|
| 2-Oxo-PCcP                    | 229                 | 1760 | C <sub>15</sub> H <sub>19</sub> NO              | 200, 172, 145, 104, 91                     |
| 2-Oxo-PCE                     | 217                 | 1635 | C <sub>14</sub> H <sub>19</sub> NO              | 189, 160, 146, 132, 117, 104, 91           |
| 2-Oxo-PCiP                    | 231                 | 1648 | C <sub>15</sub> H <sub>21</sub> NO              | 203, 174, 160, 132, 117, 104, 91           |
| 2-Oxo-PCMe AC                 | 245                 | 1990 | C <sub>15</sub> H <sub>19</sub> NO <sub>2</sub> | 217, 174, 160, 144, 132, 118, 104, 91      |
| 2-Oxo-PCPr                    | 231                 | 1747 | C <sub>15</sub> H <sub>21</sub> NO              | 203, 174, 160, 132, 117, 104, 91           |
| 2-Oxo-PCPr AC                 | 273                 | 2038 | C <sub>15</sub> H <sub>21</sub> NO              | 245, 203, 174, 160, 144, 132, 117, 104, 91 |
| N-Dealkylation AC             | 231                 | 1874 | C <sub>14</sub> H <sub>17</sub> NO <sub>2</sub> | 188, 174, 144, 132, 104, 91                |

**Table S7.** 2-Oxo-PCcP and its metabolites detected in rat urine after oral administration using different sample preparations in combination with LC-HRMS/MS (#) or GC-MS (\*). Metabolite IDs correspond to Tables S1. CM, 2-oxo-PCcP metabolite; UPP, urine precipitation; UGLUC, urine after glucuronidase/arylsulfatase cleavage; LLE, liquid-liquid extraction; SPE, solid-phase extraction; UHyAc, partial urine hydrolysis followed by LLE and acetylation

| Metabolite ID | Sample preparation performed |              |          |              |              |
|---------------|------------------------------|--------------|----------|--------------|--------------|
|               | UPP#                         | UGLUC LLE#   | SPE#     | UGLUC SPE#   | UHyAC*       |
| 2-oxo-PCcP    | not detected                 | not detected | detected | detected     | not detected |
| CM1           | detected                     | detected     | detected | detected     | detected     |
| CM2           | not detected                 | not detected | detected | not detected | not detected |
| CM3           | not detected                 | detected     | detected | detected     | not detected |
| CM4           | not detected                 | detected     | detected | detected     | not detected |
| CM5           | detected                     | not detected | detected | not detected | not detected |
| Summary       | 2 of 6                       | 3 of 6       | 6 of 6   | 4 of 6       | 1 of 6       |

**Table S8.** 2-Oxo-PCE and its metabolites detected in rat urine after oral administration using different sample preparations in combination with LC-HRMS/MS (#) or GC-MS (\*). Metabolite IDs correspond to Table S2. EM, 2-oxo-PCE metabolite; UPP, urine precipitation; UGLUC, urine after glucuronidase/arylsulfatase cleavage; LLE, liquid-liquid extraction; SPE, solid-phase extraction; UHyAc, partial urine hydrolysis followed by LLE and acetylation

| Metabolite ID | Sample preparation performed |              |          |              |              |
|---------------|------------------------------|--------------|----------|--------------|--------------|
|               | UPP#                         | UGLUC LLE#   | SPE#     | UGLUC SPE#   | UHyAC*       |
| 2-Oxo-PCE     | detected                     | detected     | detected | detected     | not detected |
| EM1           | detected                     | detected     | detected | detected     | detected     |
| EM2           | detected                     | detected     | detected | detected     | not detected |
| EM3           | detected                     | detected     | detected | detected     | not detected |
| EM4           | detected                     | detected     | detected | detected     | not detected |
| EM5           | detected                     | not detected | detected | not detected | not detected |
| Summary       | 6 of 6                       | 5 of 6       | 6 of 6   | 5 of 6       | 1 of 6       |

**Table S9.** 2-Oxo-PCiP and its metabolites detected in rat urine after oral administration using different sample preparations in combination with LC-HRMS/MS (#) or GC-MS (\*). Metabolite IDs correspond to Table S3. IM, 2-oxo-PCiP metabolite; UPP, urine precipitation; UGLUC, urine after glucuronidase/arylsulfatase cleavage; LLE, liquid-liquid extraction; SPE, solid-phase extraction; UHyAc, partial urine hydrolysis followed by LLE and acetylation

| Metabolite ID | Sample preparation performed |              |              |              |              |
|---------------|------------------------------|--------------|--------------|--------------|--------------|
|               | UPP#                         | UGLUC LLE#   | SPE#         | UGLUC SPE#   | UHyAC*       |
| 2-Oxo-PCiP    | not detected                 | detected     | detected     | detected     | not detected |
| IM1           | detected                     | detected     | detected     | detected     | detected     |
| IM2           | not detected                 | detected     | detected     | detected     | not detected |
| IM3           | not detected                 | not detected | detected     | not detected | not detected |
| IM4           | detected                     | detected     | detected     | detected     | not detected |
| IM5           | not detected                 | detected     | not detected | detected     | not detected |
| IM6           | not detected                 | detected     | not detected | detected     | not detected |
| IM7           | not detected                 | not detected | detected     | not detected | not detected |
| IM8           | detected                     | not detected | detected     | not detected | not detected |
| IM9           | detected                     | not detected | detected     | not detected | not detected |
| Summary       | 4 of 10                      | 6 of 10      | 8 of 10      | 6 of 10      | 1 of 10      |

**Table S10.** 2-Oxo-PCMe and its metabolites detected in rat urine after oral administration using different sample preparations in combination with LC-HRMS/MS (#) or GC-MS (\*). Metabolite IDs correspond to Table S4. MM, 2-oxo-PCMe metabolite; UPP, urine precipitation; UGLUC, urine after glucuronidase/arylsulfatase cleavage; LLE, liquid-liquid extraction; SPE, solid-phase extraction; UHyAc, partial urine hydrolysis followed by LLE and acetylation

| Metabolite ID | Sample preparation performed |              |          |              |              |
|---------------|------------------------------|--------------|----------|--------------|--------------|
|               | UPP#                         | UGLUC LLE#   | SPE#     | UGLUC SPE#   | UHyAC*       |
| 2-Oxo-PCMe    | detected                     | detected     | detected | detected     | not detected |
| MM1           | detected                     | detected     | detected | detected     | detected     |
| MM2           | detected                     | detected     | detected | detected     | not detected |
| MM3           | detected                     | detected     | detected | detected     | not detected |
| MM4           | detected                     | detected     | detected | detected     | not detected |
| MM5           | detected                     | detected     | detected | detected     | not detected |
| MM6           | not detected                 | detected     | detected | detected     | not detected |
| MM7           | not detected                 | not detected | detected | not detected | not detected |
| MM8           | detected                     | not detected | detected | not detected | not detected |
| MM9           | not detected                 | not detected | detected | not detected | not detected |
| Summary       | 7 of 10                      | 7 of 10      | 10 of 10 | 7 of 10      | 1 of 10      |

**Table S11.** 2-Oxo-PCPr and its metabolites detected in rat urine after oral administration using different sample preparations in combination with LC-HRMS/MS (\*) or GC-MS (\*). Metabolite IDs correspond to Table S5. PM, 2-oxo-PCPr metabolite; UPP, urine precipitation; UGLUC, urine after glucuronidase/arylsulfatase cleavage; LLE, liquid-liquid extraction; SPE, solid-phase extraction; UHyAc, partial urine hydrolysis followed by LLE and acetylation

| Metabolite ID | Sample preparation performed |                        |                  |                        |                    |
|---------------|------------------------------|------------------------|------------------|------------------------|--------------------|
|               | UPP <sup>#</sup>             | UGLUC LLE <sup>#</sup> | SPE <sup>#</sup> | UGLUC SPE <sup>#</sup> | UHyAC <sup>*</sup> |
| 2-Oxo-PCPr    | detected                     | detected               | detected         | detected               | not detected       |
| PM1           | detected                     | detected               | detected         | detected               | detected           |
| PM2           | detected                     | detected               | detected         | detected               | not detected       |
| PM3           | detected                     | detected               | detected         | detected               | not detected       |
| PM4           | detected                     | detected               | detected         | detected               | not detected       |
| PM5           | detected                     | detected               | detected         | detected               | not detected       |
| PM6           | detected                     | detected               | detected         | detected               | not detected       |
| PM7           | detected                     | detected               | detected         | detected               | not detected       |
| PM8           | not detected                 | detected               | detected         | detected               | not detected       |
| PM9           | detected                     | detected               | detected         | detected               | not detected       |
| PM10          | detected                     | not detected           | detected         | not detected           | not detected       |
| PM11          | not detected                 | not detected           | detected         | not detected           | not detected       |
| Summary       | 10 of 12                     | 10 of 12               | 12 of 12         | 10 of 12               | 1 of 12            |

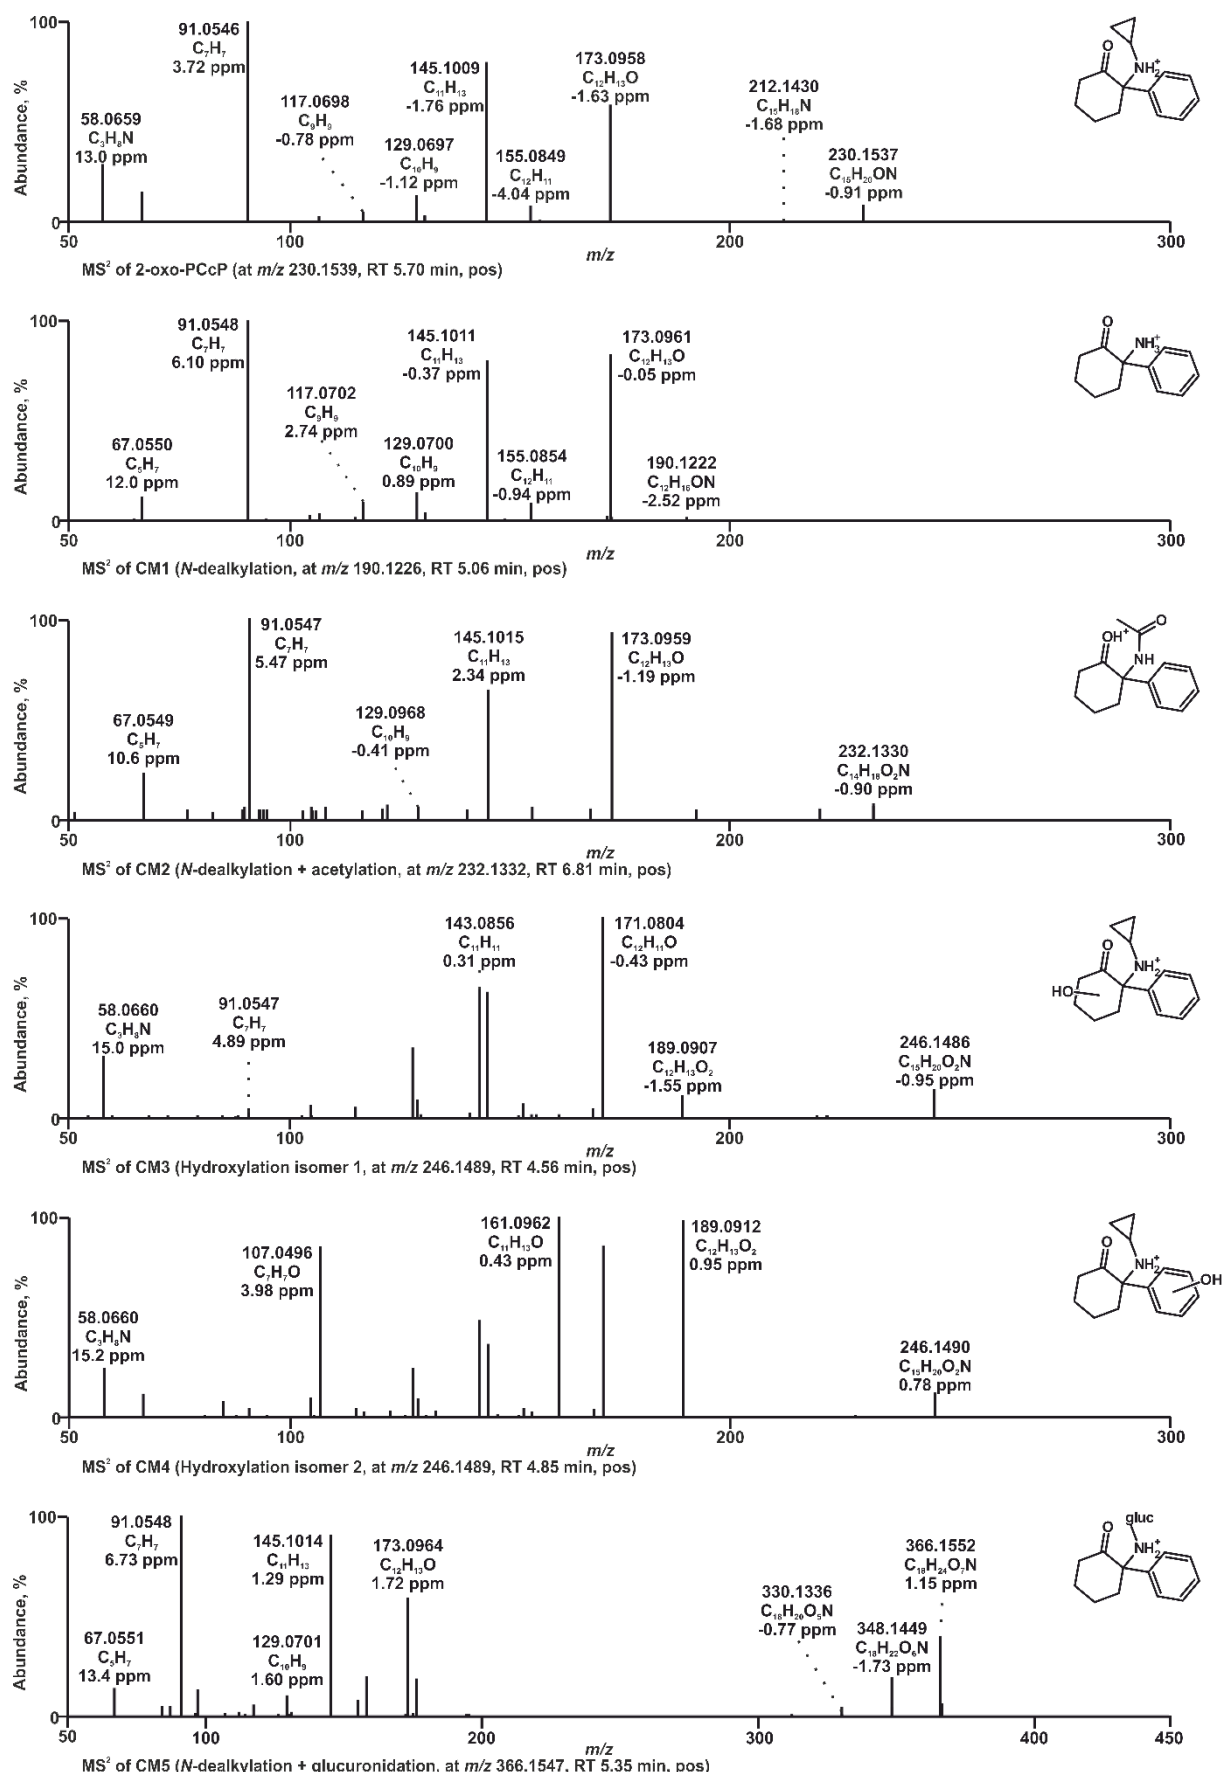

**Figure S1.** HRMS<sup>2</sup> spectra of 2-oxo-PCcP and its metabolites detected in rat urine after oral administration. Metabolite IDs correspond to Table S1. CM, 2-oxo-PCcP metabolite; RT, retention time

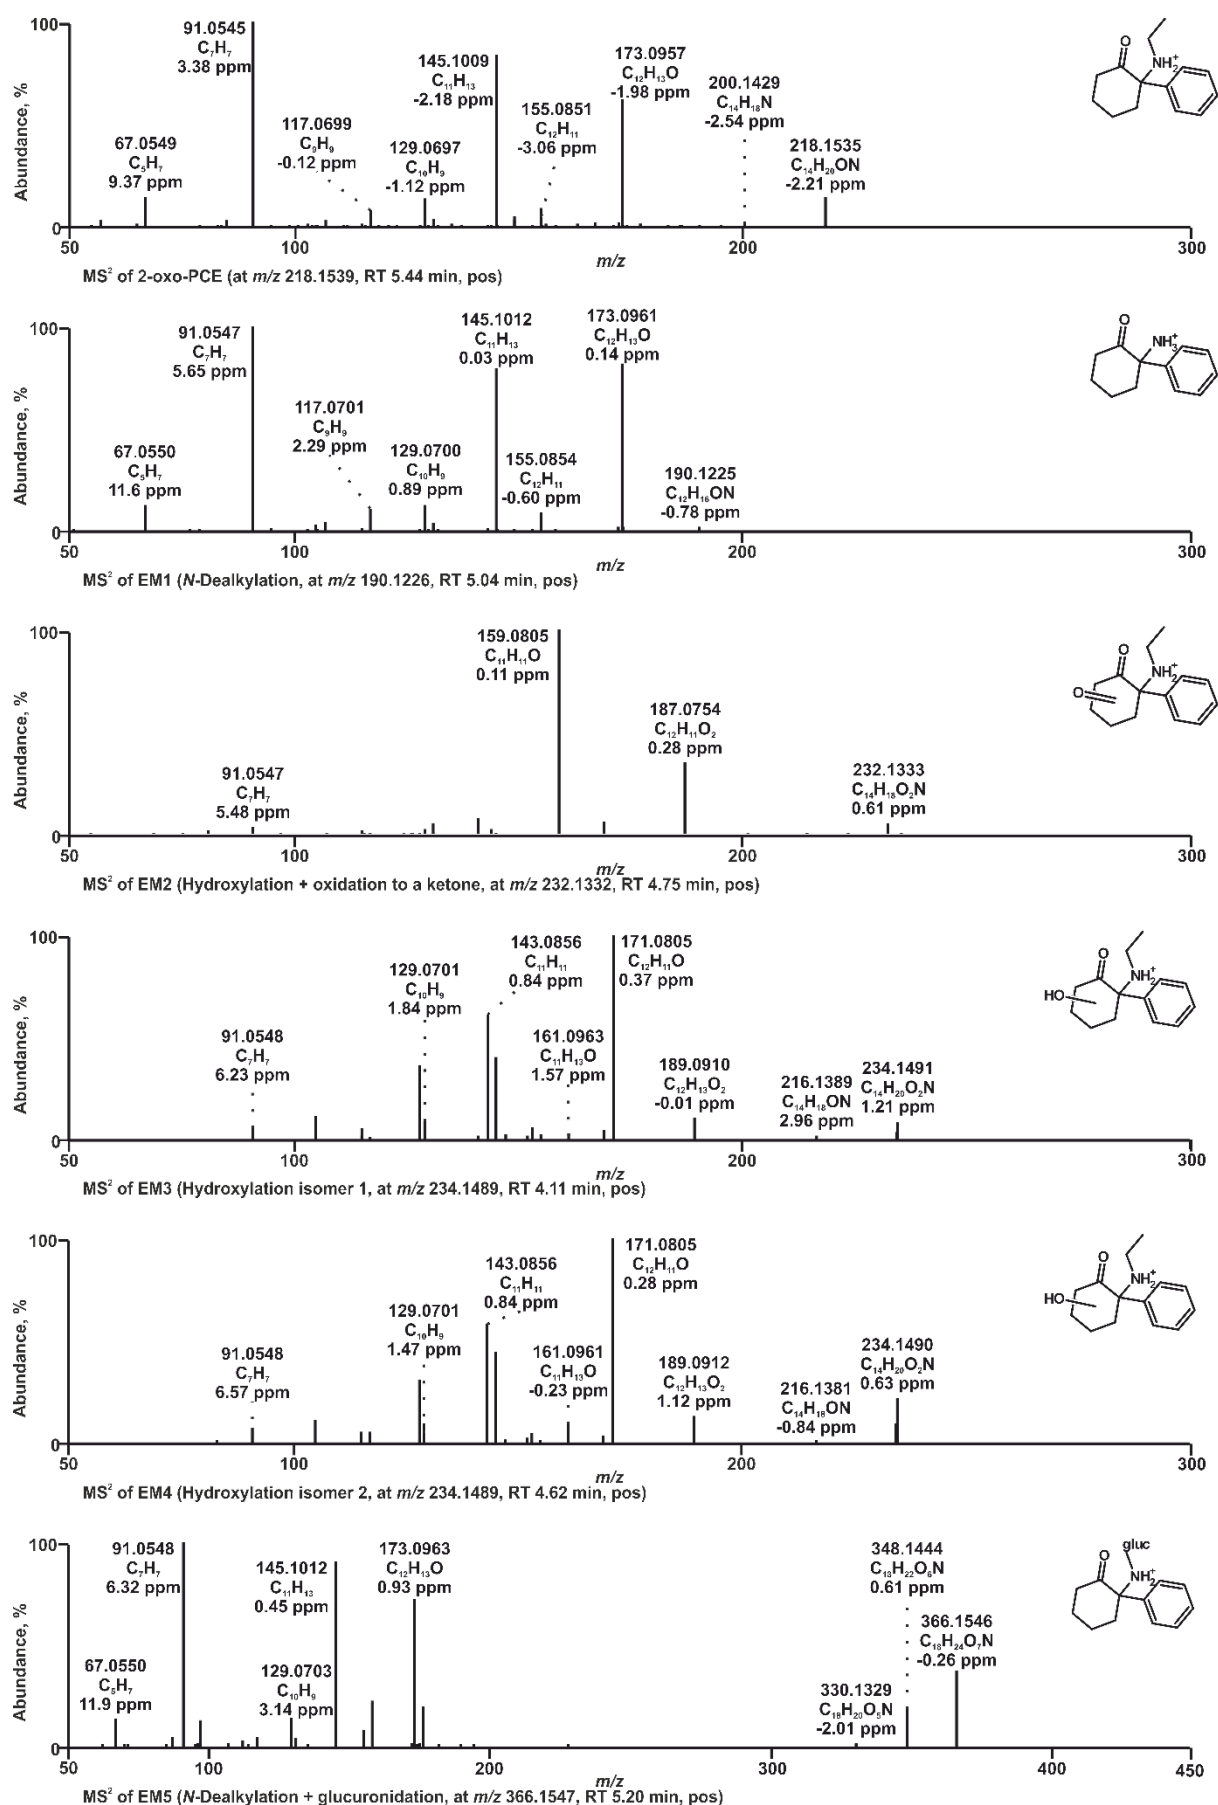

**Figure S2.** HRMS<sup>2</sup> spectra of 2-oxo-PCE and its metabolites detected in rat urine after oral administration. Metabolite IDs correspond to Table S2. EM, 2-oxo-PCE metabolite; RT, retention time

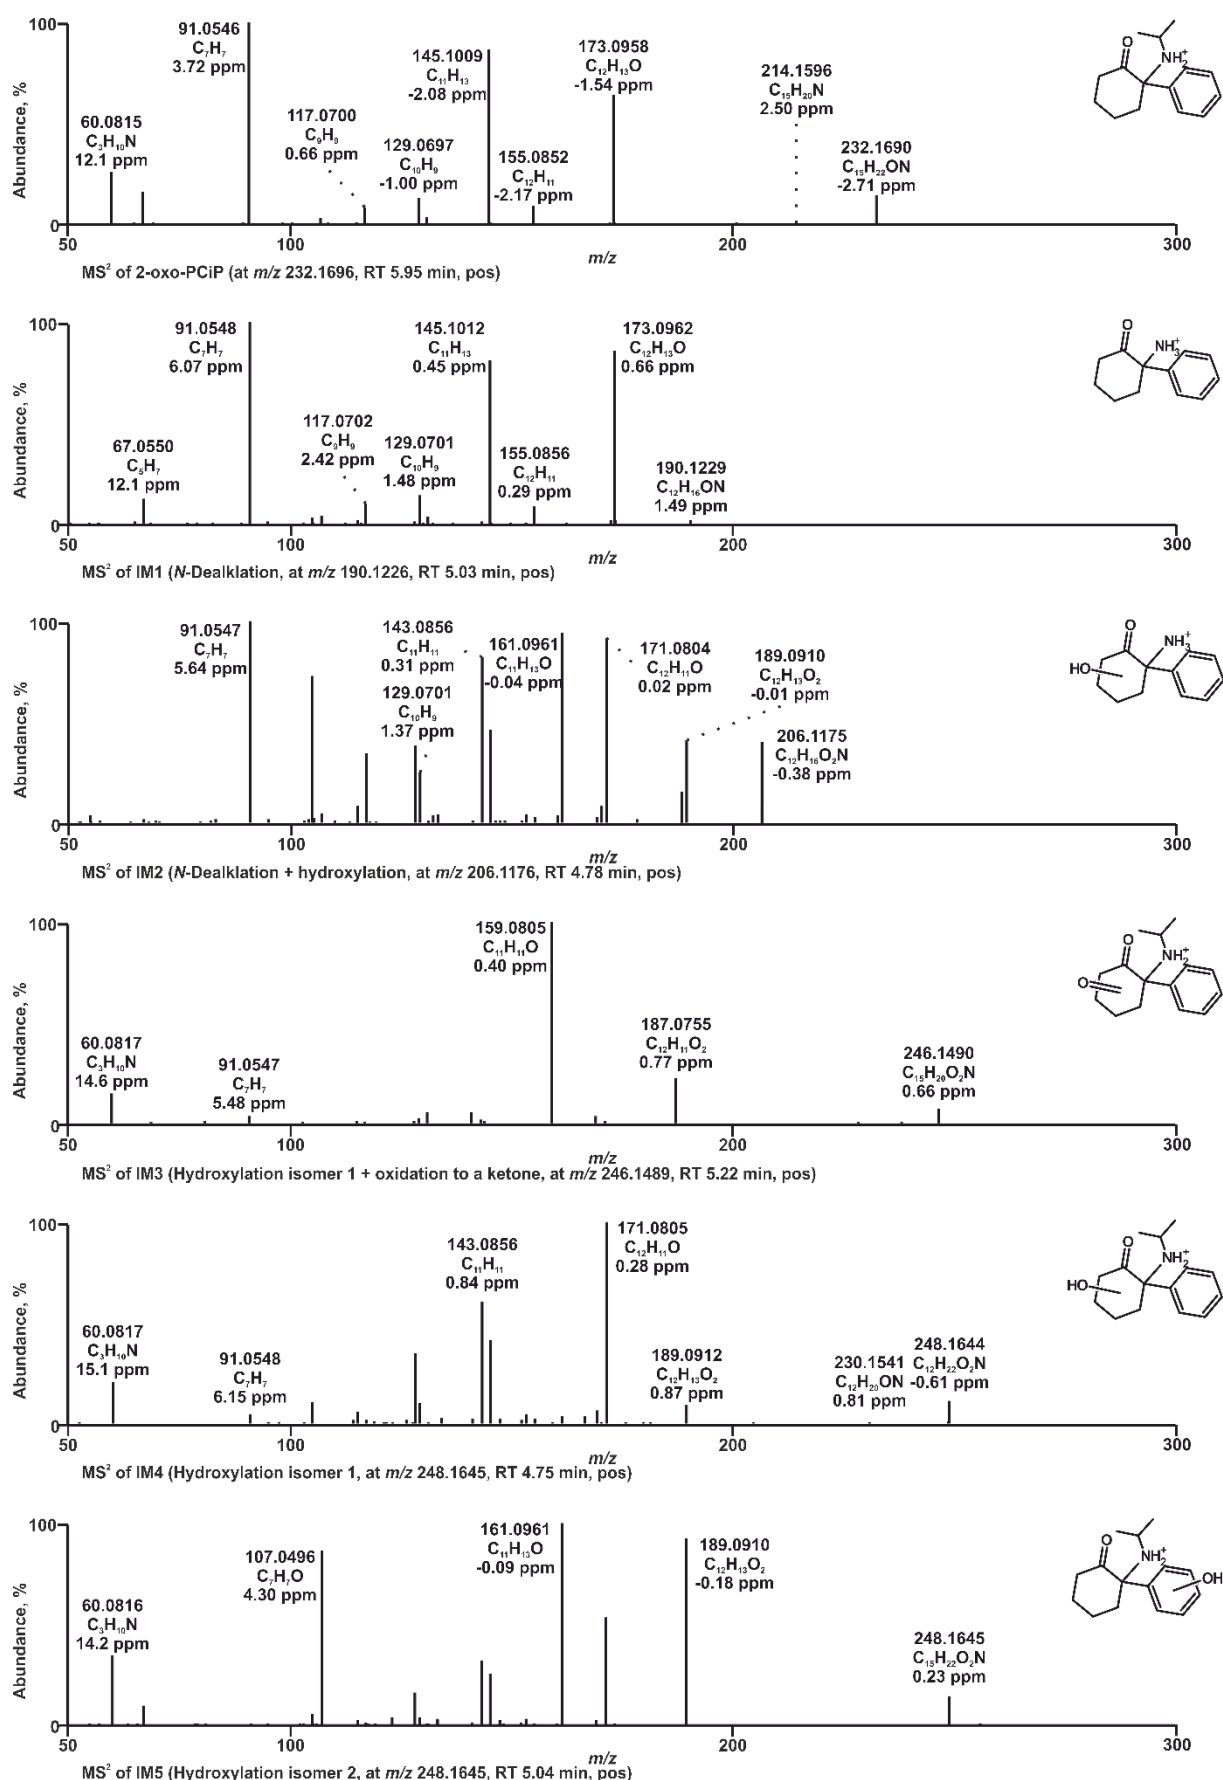

**Figure S3.** HRMS<sup>2</sup> spectra of 2-oxo-PCiP and its metabolites detected in rat urine after oral administration. Metabolite IDs correspond to Table S3. IM, 2-oxo-PCiP metabolite; RT, retention time

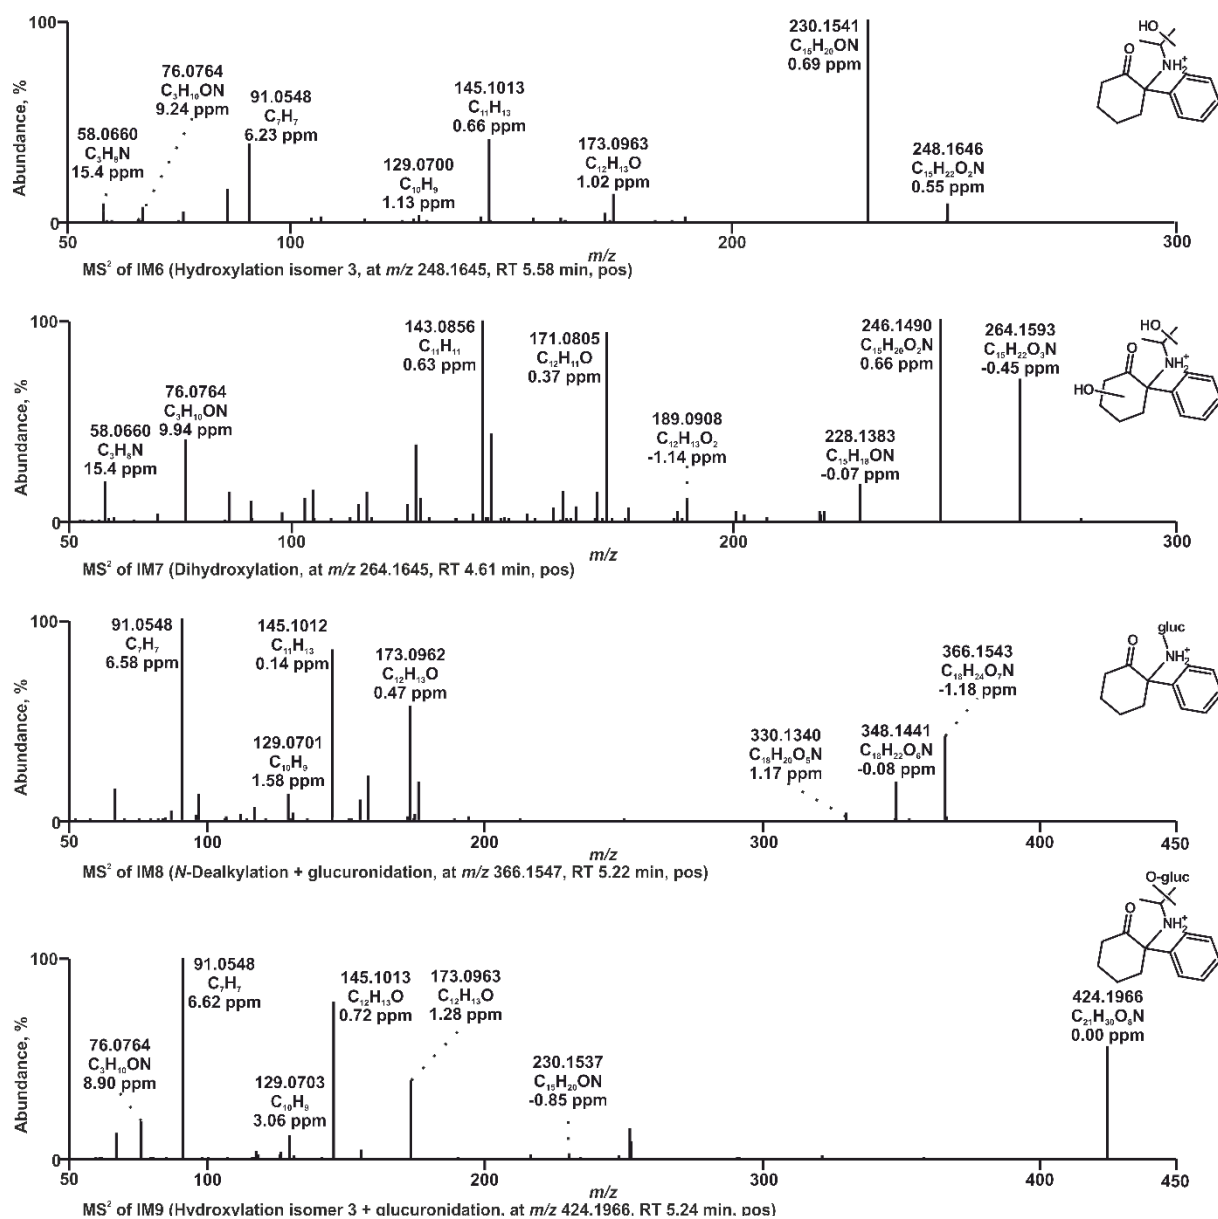



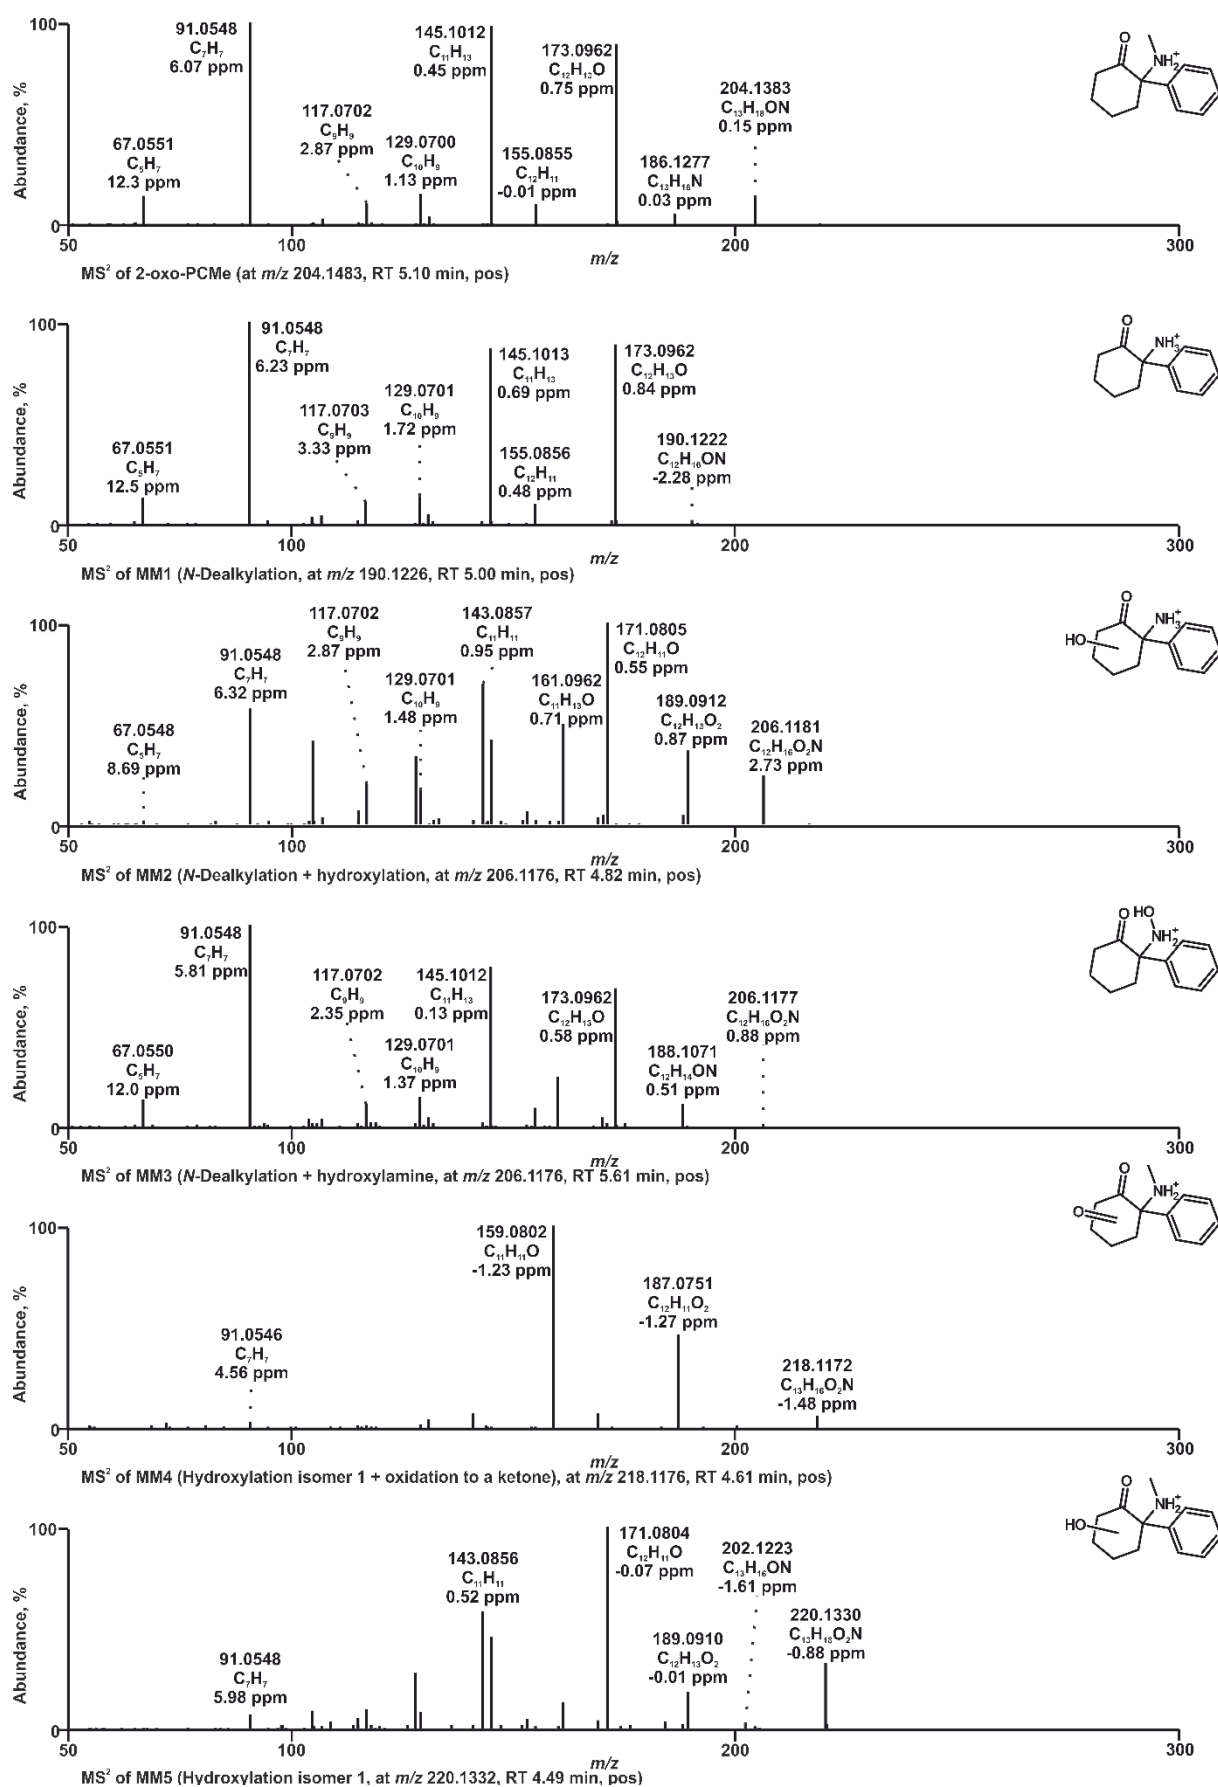

**Figure S4.** HRMS<sup>2</sup> spectra of 2-oxo-PCMe and its metabolites detected in rat urine after oral administration. Metabolite IDs correspond to Table S4. MM, 2-oxo-PCMe metabolite; RT, retention time

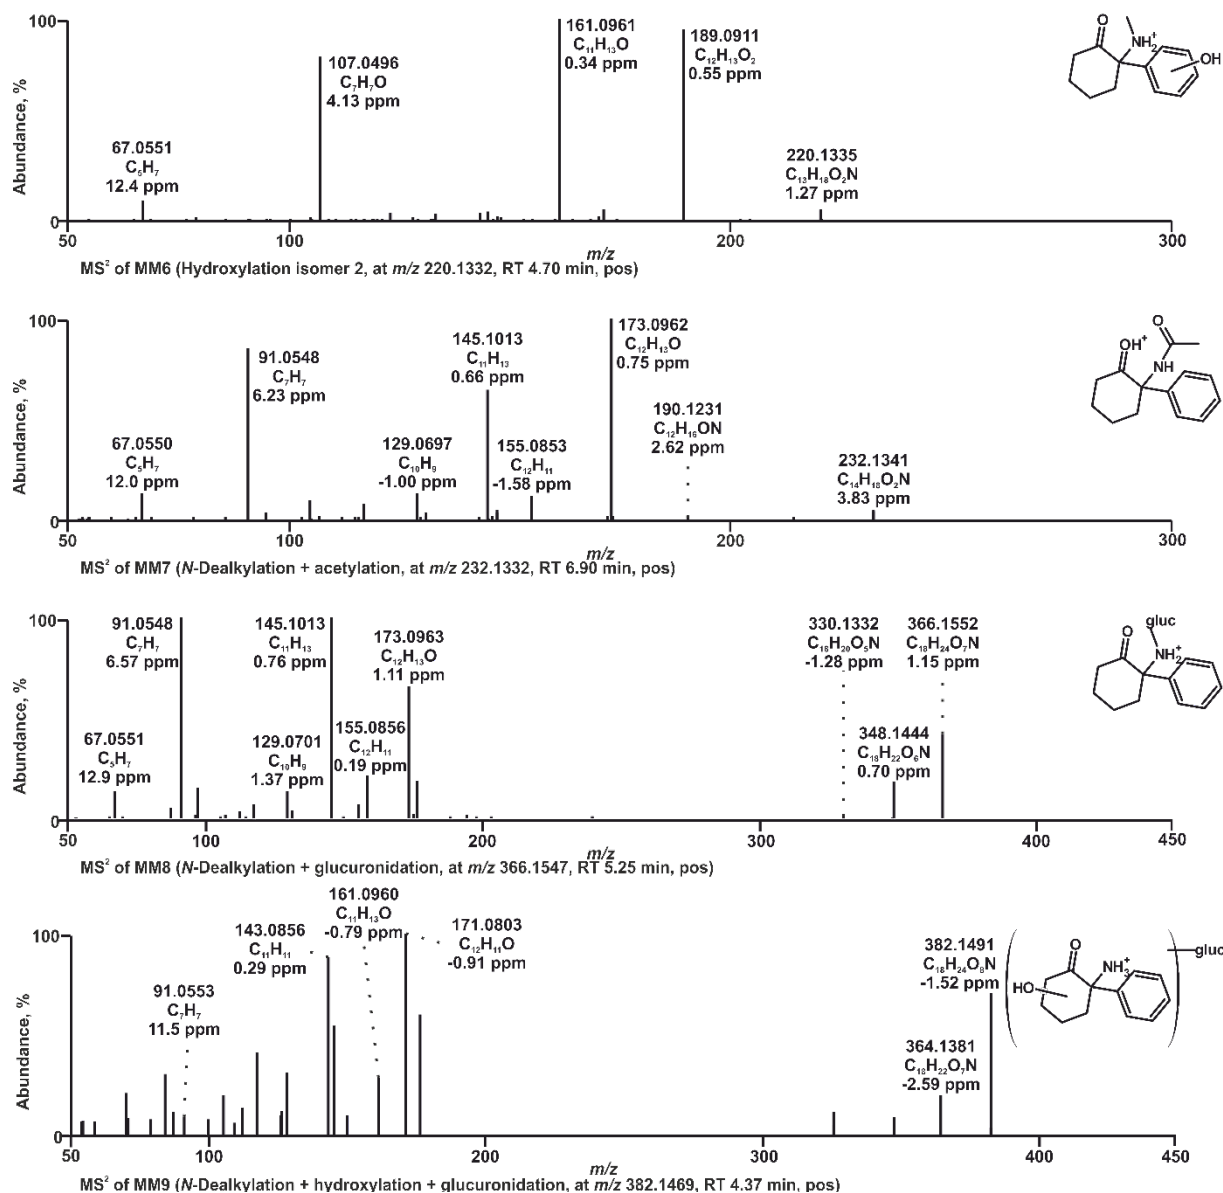

Figure S4. continued

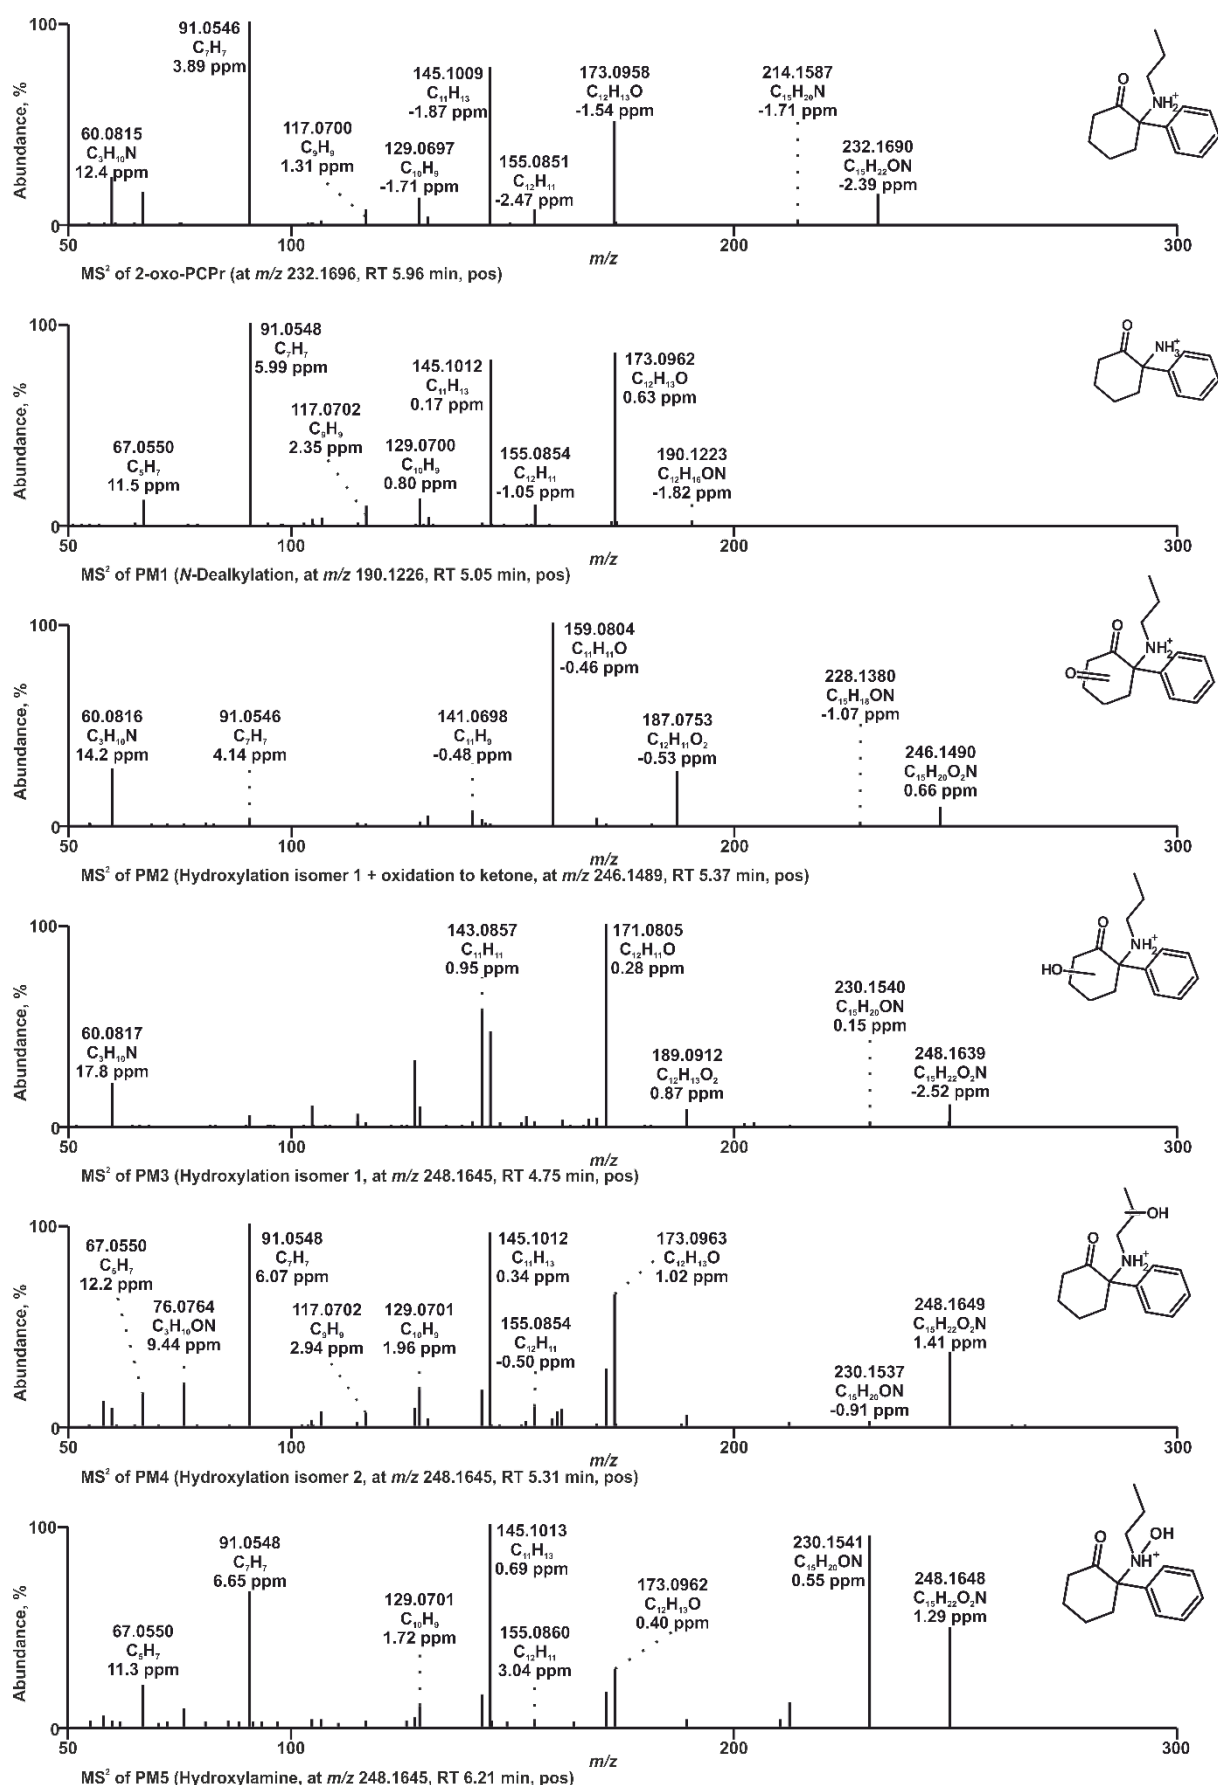

**Figure S5.** HRMS<sup>2</sup> spectra of 2-oxo-PCPr and its metabolites detected in rat urine after oral administration. Metabolite IDs correspond to Table S5. PM, 2-oxo-PCPr metabolite; RT, retention time

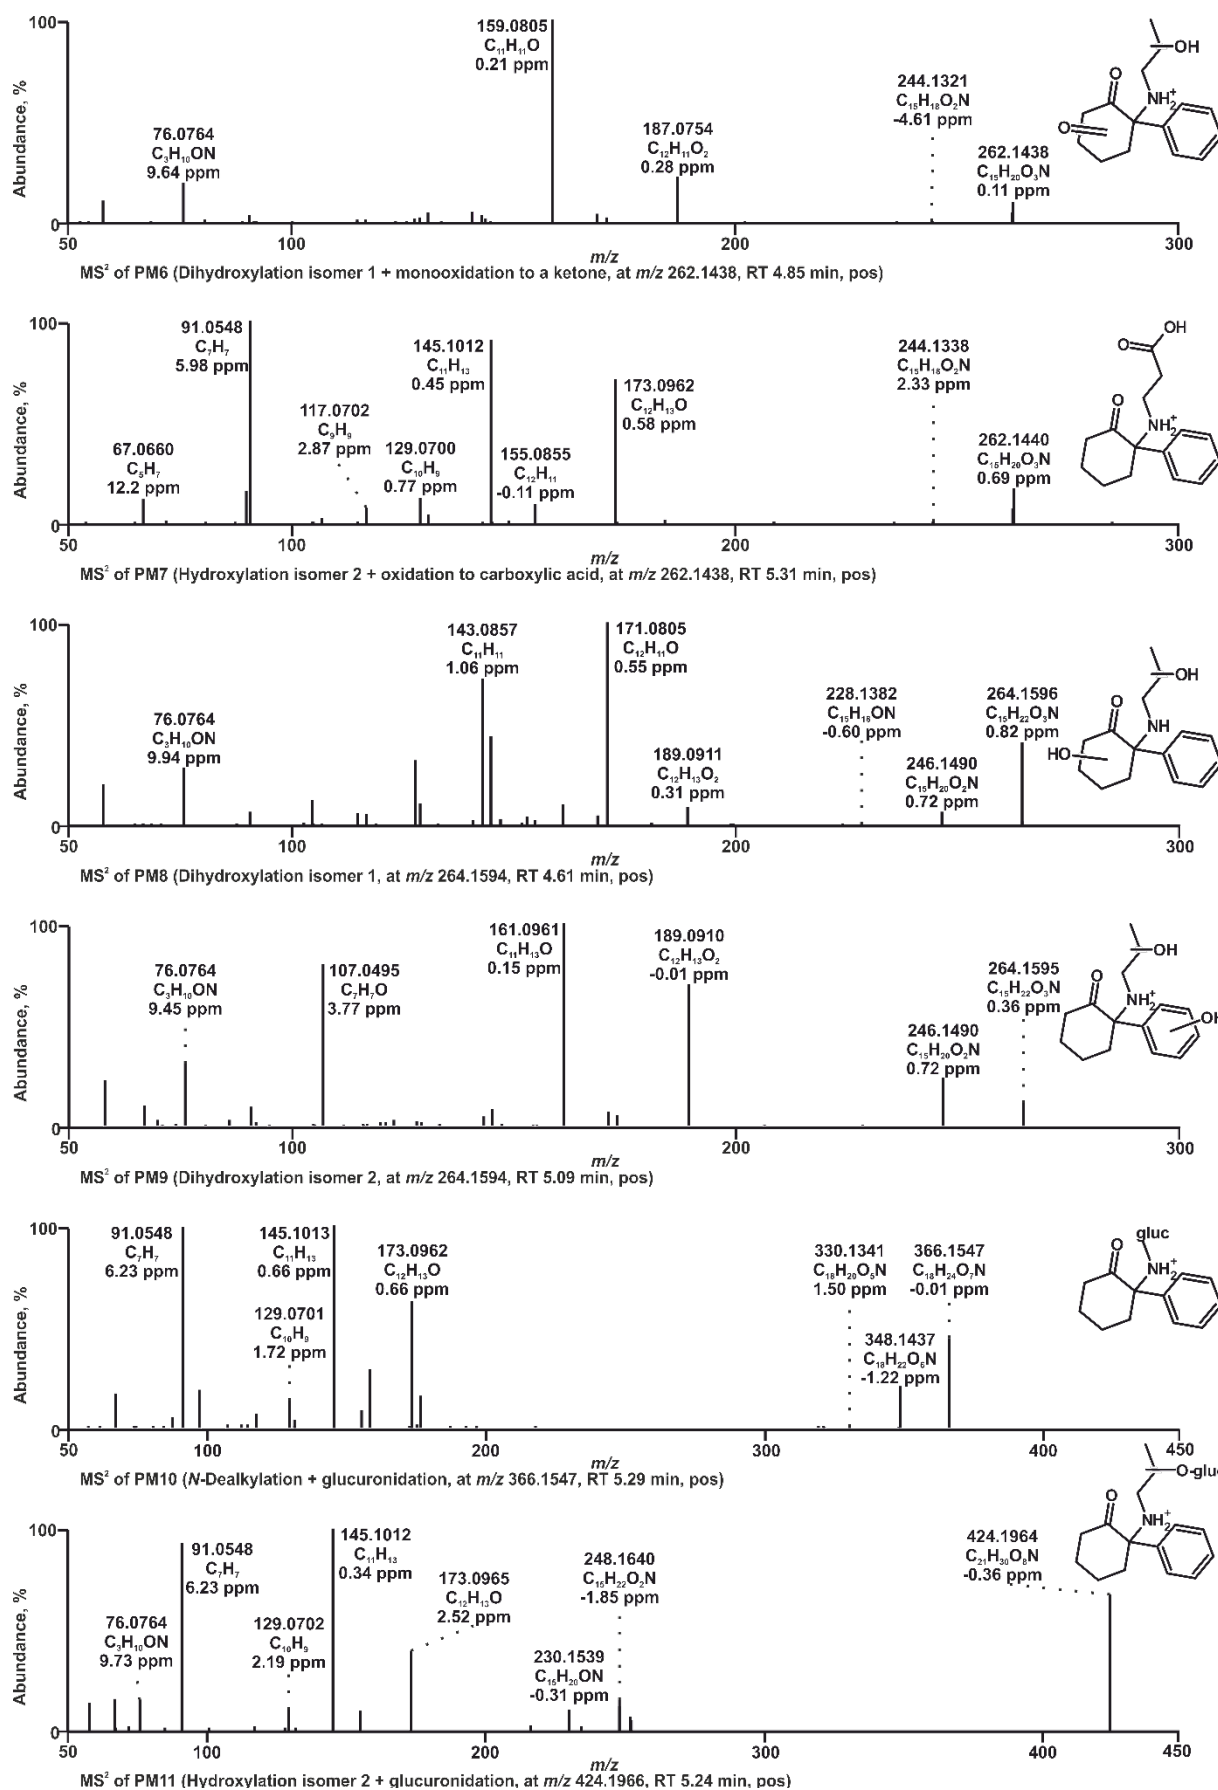

Figure S5. continued

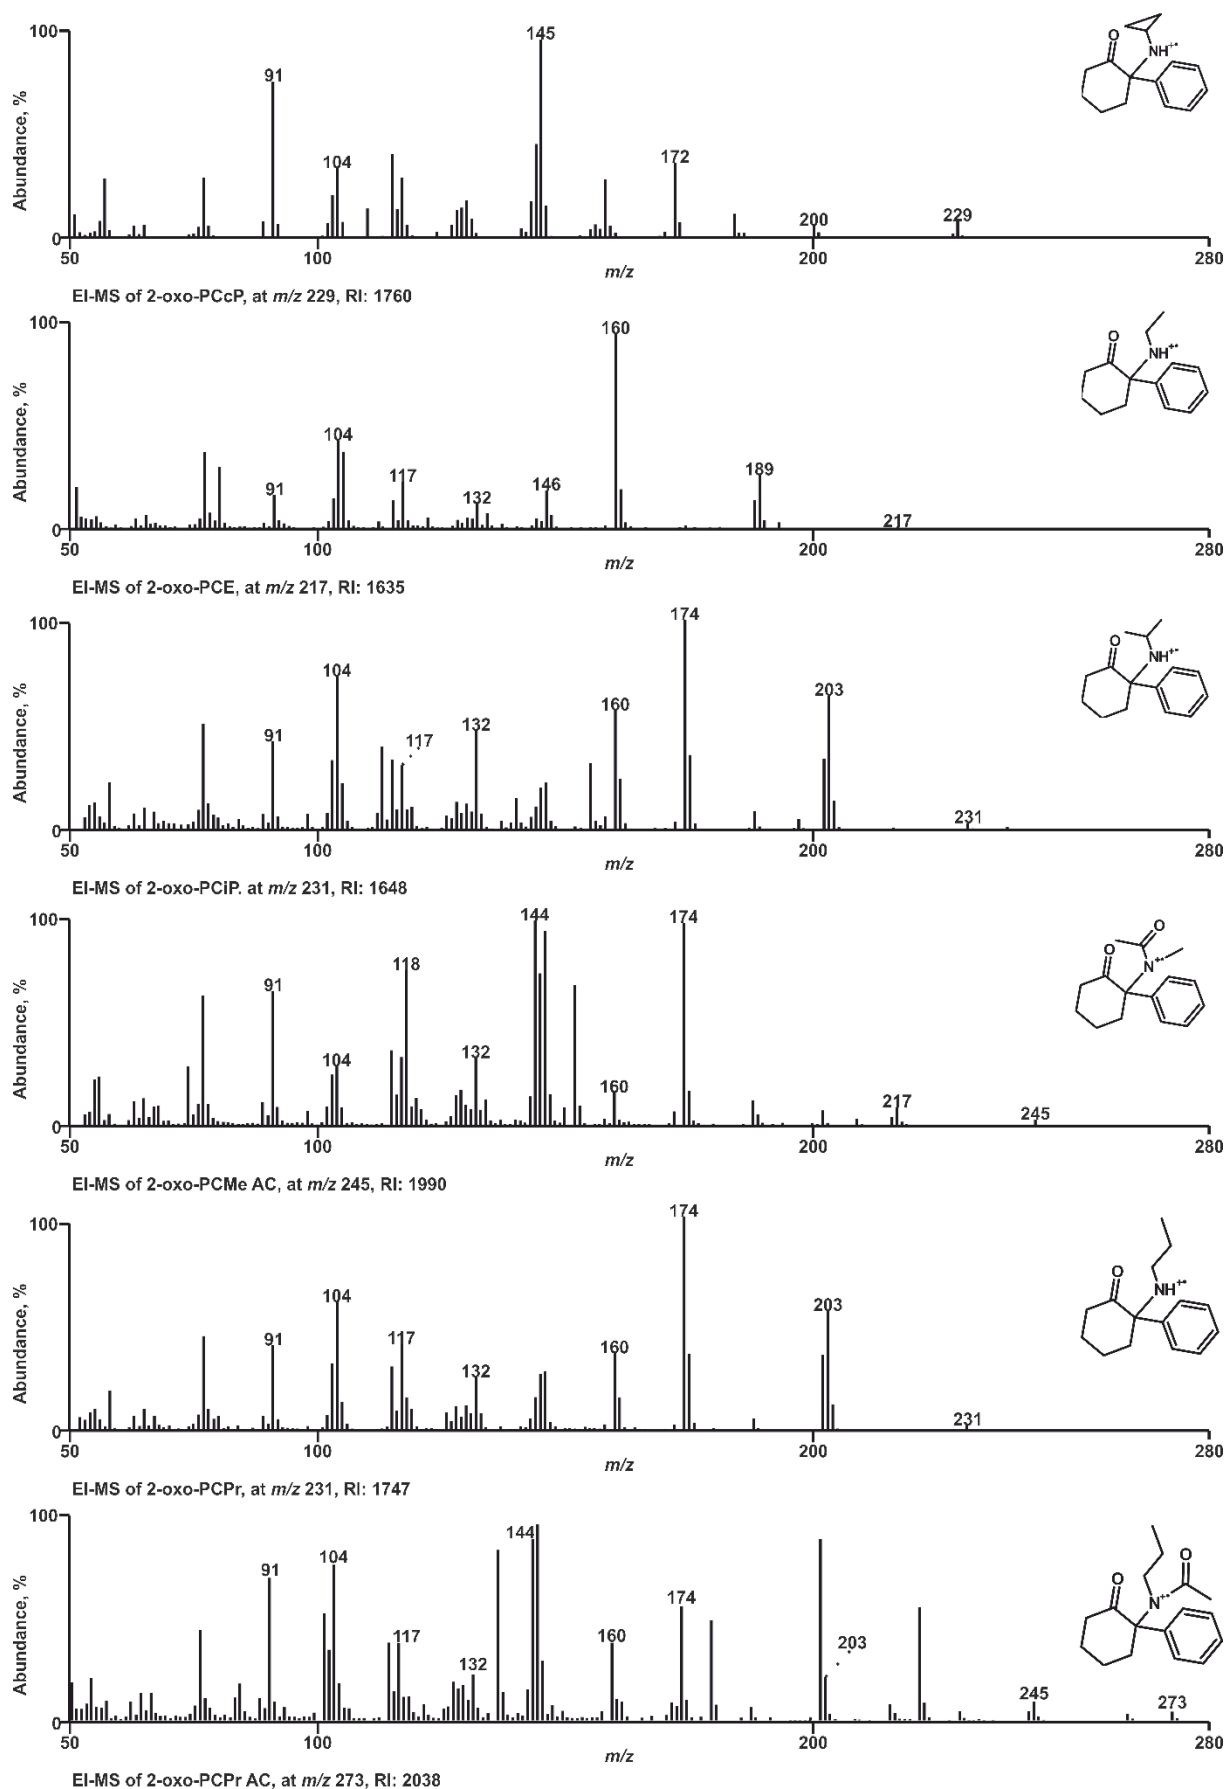

**Figure S6.** EI-MS spectra of 2-oxo-PCcP, 2-oxo-PCE, 2-oxo-PCiP, 2-oxo-PCMe AC, 2-oxo-PCPr, and acetylated *N*-dealkylation metabolites. Metabolite IDs correspond to Tables S1-S5. RI: retention index.

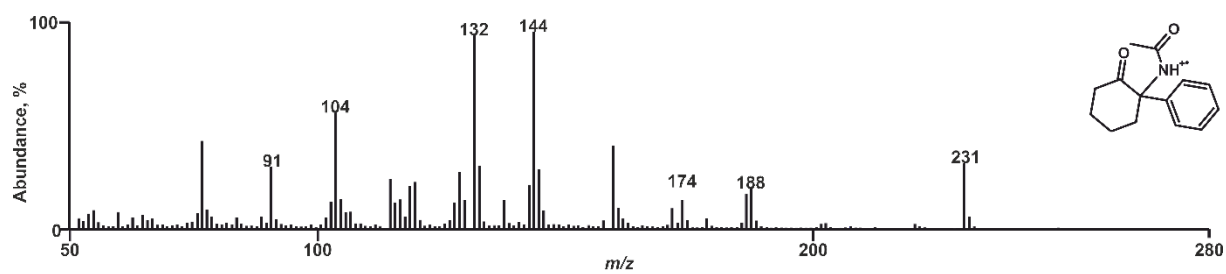

ESI-MS of acetylated *N*-dealkylation metabolites CM1, EM1, IM1, MM1, and PM1, at  $m/z$  231, RI: 1874

**Figure S6.** continued

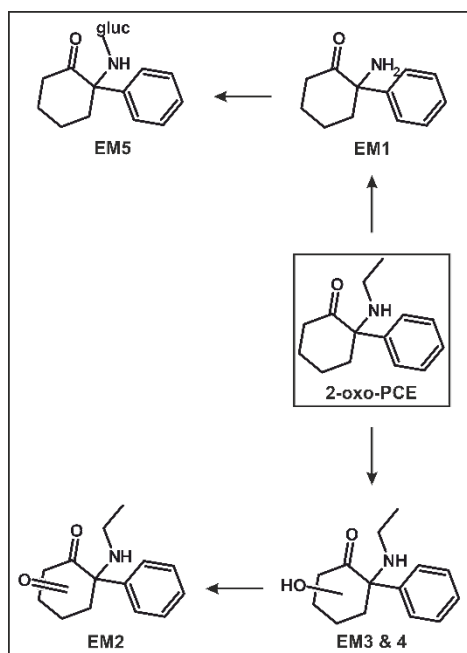

**Figure S7.** *In vivo* metabolic pathways of 2-oxo-PCE, ID corresponding to Table S2. EM, 2-oxo-PCE metabolite.

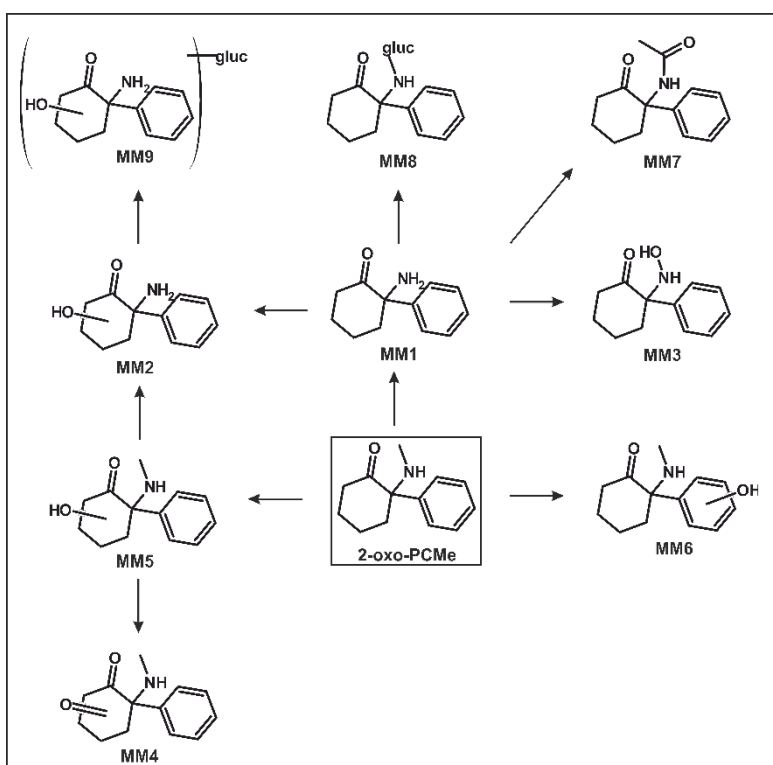

**Figure S8.** *In vivo* metabolic pathways of 2-oxo-PCMe, ID corresponding to Table S4. MM, 2-oxo-PCMe metabolite.
